1                   **TCR affinity controls the dynamics but not the functional specification**  
2                                   **of the Th1 response to mycobacteria**

3 Nayan D Bhattacharyya<sup>1,2</sup>, Claudio Counoupas<sup>3,2</sup>, Lina Daniel<sup>1,2</sup>, Guoliang Zhang<sup>4,1,2</sup>, Stuart J  
4 Cook<sup>5</sup>, Taylor A Cootes<sup>1,2</sup>, Sebastian A Stifter<sup>1,2</sup>, David G Bowen<sup>7,8</sup>, James A Triccas<sup>3,2,6</sup>, Patrick  
5 Bertolino<sup>7,8</sup>, Warwick J Britton<sup>2</sup> & Carl G Feng<sup>1,2,6\*</sup>

6  
7 **Affiliations:**

8 <sup>1</sup> Immunology and Host Defense Group, Department of Infectious Diseases and Immunology,  
9 School of Medical Sciences, Faculty of Medicine & Health, The University of Sydney, NSW,  
10 2006, Australia.

11 <sup>2</sup> Tuberculosis Research Program, Centenary Institute, Royal Prince Alfred Hospital,  
12 Camperdown, NSW, 2050, Australia.

13 <sup>3</sup> Microbial Pathogenesis and Immunity Group, Department of Infectious Diseases and  
14 Immunology, School of Medical Sciences, Faculty of Medicine & Health, University of Sydney,  
15 NSW, 2006, Australia.

16 <sup>4</sup> National Clinical Research Center for Infectious Diseases, Guangdong Key Laboratory of  
17 Emerging Infectious Diseases, Shenzhen Third People's Hospital, Southern  
18 University of Science and Technology, Shenzhen, China.

19 <sup>5</sup> Immune Imaging Program, Centenary Institute, Royal Prince Alfred Hospital, Camperdown,  
20 NSW, 2050, Australia.

21 <sup>6</sup> Marie Bashir Institute for Infectious Diseases and Biosecurity, The University of Sydney,  
22 Sydney, NSW, 2006, Australia.

23 <sup>7</sup> Liver Immunology Program, Centenary Institute, Royal Prince Alfred Hospital, Camperdown,  
24 NSW, 2050, Australia.

25 <sup>8</sup> AW Morrow Gastroenterology and Liver Centre, Royal Prince Alfred Hospital, Camperdown,  
26 NSW, 2050, Australia.

27

28 \* Corresponding author: Carl G Feng: [carl.feng@sydney.edu.au](mailto:carl.feng@sydney.edu.au)

29

30 **Abstract:**

31 The quality of T cell responses depends on the lymphocytes' ability to undergo clonal expansion,  
32 acquire effector functions and traffic to the site of infection. Although TCR signal strength is  
33 thought to dominantly shape the T cell response, by using TCR transgenic CD4<sup>+</sup> T cells with  
34 different pMHC binding affinity, we reveal that TCR affinity does not control Th1 effector  
35 function acquisition nor the functional output of individual effectors following mycobacterial  
36 infection. Rather, TCR affinity calibrates the rate of cell division to synchronize the distinct  
37 processes of T cell proliferation, differentiation and trafficking. By timing cell division-dependent  
38 IL-12R expression, TCR affinity controls when T cells become receptive to Th1-imprinting IL-12  
39 signals, determining the emergence and magnitude of the Th1 effector pool. These findings reveal  
40 a distinct yet cooperative role for IL-12 and TCR signalling in Th1 differentiation and suggests  
41 that the temporal activation of clones with different TCR affinity is a major strategy to coordinate  
42 immune surveillance against persistent pathogens.

43

44 **Keywords:**

45 TCR affinity, TCR signal, Th1 response, cell division, IL-12, mycobacteria.

46

47 **Introduction:**

48 The successful containment of invading pathogens requires the rapid generation of large numbers  
49 of antigen-specific T cells with the correct effector function. This involves the activation of distinct  
50 programs, including T cell proliferation, differentiation, and migration. Failure in activating or  
51 regulating these programs results in impaired host defense. The majority of studies have focused  
52 on one or a limited number of CD4<sup>+</sup> T cell programs, such as, the magnitude of population  
53 expansion or expression of master regulators of transcription. There is little information available  
54 as to whether these processes, which operate at different biological scales spanning from the  
55 molecule to the tissue, are individually or cooperatively regulated *in vivo*. Indeed, *in vitro* studies  
56 have already suggested a link between cell division and differentiation, demonstrating that cell  
57 division progression is associated with increased expression of signature Th cytokines (1-3).

58 The pool of naive T cells *in vivo* is diverse and contains clones that express distinct TCRs  
59 recognizing different peptide:MHC (pMHC) complexes. It is estimated that there are anywhere  
60 between twenty and one thousand naive T cells that possess the same pMHC specificity (4, 5),  
61 each with different binding affinities. The strength of TCR signals, regulated by the TCRs affinity,  
62 the density of pMHC and co-stimulatory molecules on antigen presenting cells (APCs), regulates  
63 downstream T cell activation and function (6, 7). While high affinity TCR signals in cytotoxic  
64 CD8<sup>+</sup> T lymphocytes accelerate cell division and prolong population expansion (8, 9), it delays  
65 their migration from secondary lymphoid organs (SLOs) (9, 10) resulting in impaired pathogen  
66 control (10). Similarly, strong TCR signals enhance the expansion of CD4<sup>+</sup> T cell populations (11-  
67 13).

68 Defining the role of TCR signaling strength in the CD4<sup>+</sup> lymphocyte response is  
69 challenging because of the functional heterogeneity in helper T cell populations. The effector

70 function of Th populations is instructed by signals from the TCR as well as from pathogen-  
71 conditioned accessory cells and APCs. Historically, investigations into Th cell differentiation have  
72 focused on “qualitative” T cell-extrinsic cytokine signals (7, 14). In the case of Th1 differentiation,  
73 the innate cytokine IL-12 promotes the generation of interferon- $\gamma$  (IFN- $\gamma$ )-producing effectors (15,  
74 16) and host survival following infection with intracellular pathogens (17). Recent studies have  
75 suggested a role for “quantitative” differences in TCR signal strength in regulating CD4<sup>+</sup> T cell  
76 differentiation (12, 18-20). Potent TCR signaling is associated with the generation of Th1 (18, 19)  
77 or Tfh cells (11, 20, 21). Mechanisms proposed to mediate strong TCR signal-driven Th lineage  
78 commitment vary depending on experimental settings. For example, IL-2 (12, 13, 19) and IL-12  
79 receptor signaling (18) have each been suggested to contribute to the generation of Th1 populations  
80 following potent TCR stimulation. The model-dependent function of strong TCR signaling  
81 suggests a potential interplay between quantitative TCR and qualitative environmental signals in  
82 instructing Th differentiation. Currently, the relative role of TCR and innate cytokine signals in  
83 lineage commitment and the mechanisms integrating these signals is unknown.

84 In this study, we developed a T cell adoptive transfer model using CD4<sup>+</sup> T cells from two  
85 TCR transgenic (Tg) mouse lines that recognize the same epitope of the *Mycobacterium*  
86 *tuberculosis* protein Early Secretory Antigenic Target 6 (ESAT-6, E6), with different binding  
87 affinities. Following T cell transfer, WT or IL-12-deficient recipient mice were infected with a  
88 recombinant *Mycobacterium bovis* Bacillus Calmette-Guérin-expressing E6 (BCG-E6). By  
89 tracking transgenic CD4<sup>+</sup> T cells across multiple time-points and in different tissues following  
90 intravenous (i.v.) BCG infection, we reveal that by adjusting the rate of cell division, a major  
91 function of TCR affinity is to determine the speed and magnitude of the CD4<sup>+</sup> T cell response.  
92 Moreover, TCR affinity plays a minimal role in specifying T helper cell effector function.

93 However, by regulating cell division-dependent IL-12R $\beta$ 2 expression, TCR affinity controls when  
94 T cells become receptive to IL-12 and acquire Th1 effector function. Since high affinity CD4<sup>+</sup> T  
95 cells also migrate to infected non-lymphoid tissues faster than their low affinity counterparts, our  
96 findings show that TCR affinity coordinates multiple programs to determine the overall potency  
97 of the Th cell response to infection. They also suggest that the temporal activation of distinct T  
98 cell clones is a mechanism controlling the initiation and maintenance of Th1 immunity against  
99 persistent infection.

100

101 **Results:**

102 **CD4<sup>+</sup> T cells with high affinity TCRs are primed earlier and expand further than low affinity**  
103 **cells during mycobacterial infection**

104 To allow a direct comparison of the current and previous studies, which were focused primarily  
105 on T cell responses in the spleen following i.v. infection, we developed an i.v. BCG infection and  
106 CD4<sup>+</sup> T cell transfer model (Fig. 1A). BCG delivered by the i.v. route infects primarily the liver  
107 and spleen, with the liver being the main site of infection (Fig. S1A). To study the contribution of  
108 intrinsic variations in TCR signal strength to the CD4<sup>+</sup> T cell response, recipient mice were  
109 adoptively transferred with GFP-expressing CD4<sup>+</sup> T cells isolated from two strains of TCR Tg  
110 mice (C7 and C24). The TCR of C7 and C24 cells recognize the ESAT6<sub>1-20</sub> (E6) epitope with  
111 low/intermediate and high binding affinity, respectively (22). Recipient mice were then infected  
112 with a recombinant BCG that expresses the E6 epitope (BCG-E6) recognized by the T cells. The  
113 donor E6-specific CD4<sup>+</sup> T cells were distinguished from endogenous T lymphocytes by their  
114 expression of GFP (Fig. 1B).

115 In this model, both C7 (low affinity) and C24 (high affinity) T cells were detected in the  
116 spleen, liver and liver draining lymph nodes (dLN) as early as day 1 after i.v. BCG infection (Fig.  
117 1C). Cell division, assessed by CTV dye dilution, was first detected in Tg cells in the spleen,  
118 indicating that the organ is the primary site of T cell priming in this model. CD4<sup>+</sup> T cell expansion  
119 peaked at day 3 post-infection (p.i.) in the spleen compared to day 6 p.i. in the liver and its draining  
120 LN (Fig. 1D). Importantly, high affinity C24 cell populations expanded more than lower affinity  
121 C7 cells in the spleen, dLN, and liver. Although high affinity C24 T cells demonstrated lower TCR  
122 expression when compared to lower affinity C7 cells at day 6 p.i. in the spleen (Fig. S1B), the  
123 former Tg T cells exhibited unimpaired IFN- $\gamma$  expression when re-stimulated with E6 peptide or

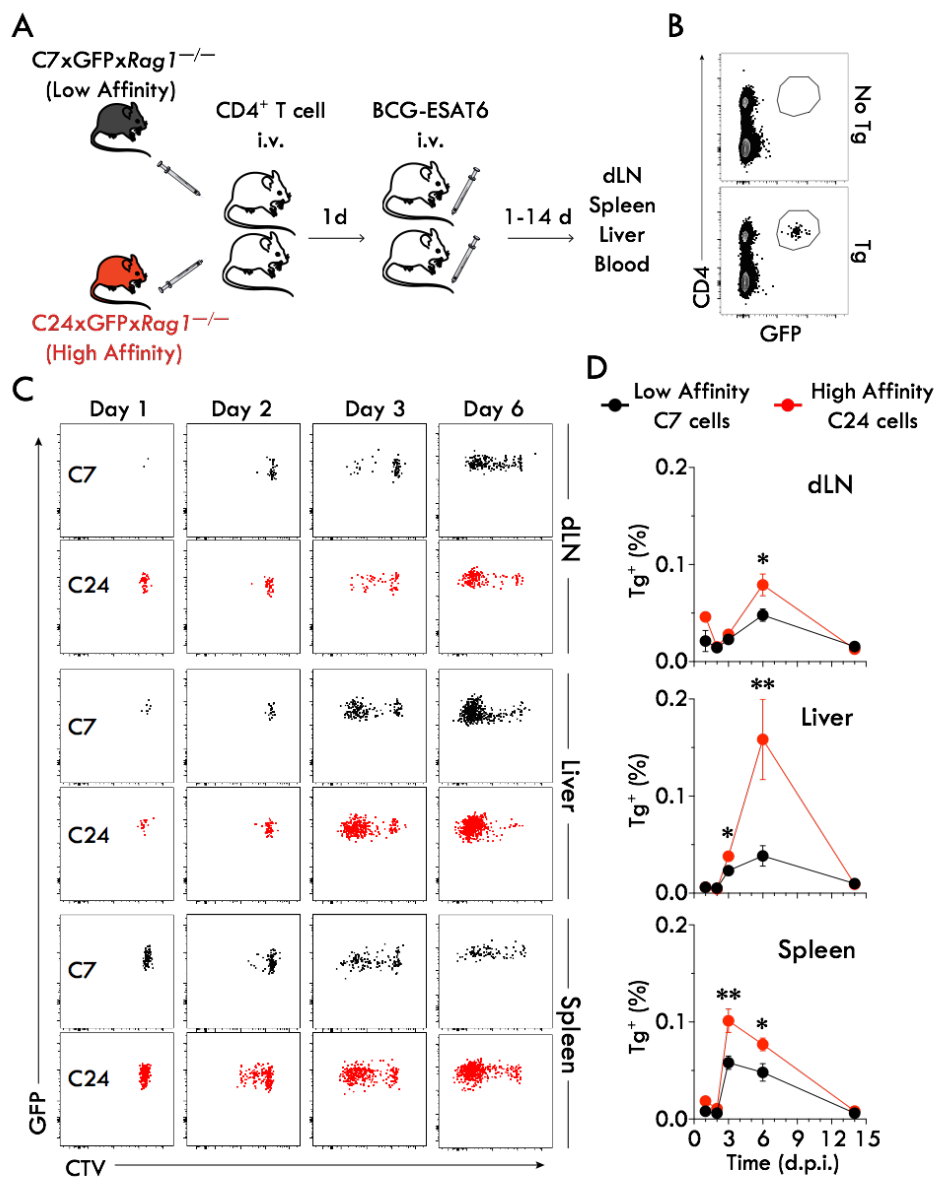

**Figure 1. CD4<sup>+</sup> T cells with high affinity TCRs undergo enhanced accumulation in lymphoid and non-lymphoid organs following mycobacterial infection.**

(A) Schematic diagram illustrating the adoptive transfer and infection model. Magnetically-purified CD4<sup>+</sup> T cells from *C7xGFPxRag1<sup>-/-</sup>* or *C24xGFPxRag1<sup>-/-</sup>* TCR transgenic (Tg) mice were transferred i.v. into separate intact, naïve C57BL/6 (B6) recipients (10<sup>5</sup> / mouse) 1 d prior to i.v. inoculation with BCG-E6 (10<sup>6</sup> CFU / mouse). The liver-draining lymph node (dLN), spleen, liver and spleen was collected at various time-points p.i.. (B) Flow cytometric detection of GFP-expressing TCR Tg T cells in the spleens of recipient mice that did not receive or received transgenic T cells 3 days after BCG-E6 infection. (C) Flow cytometric analysis of CTV dilution in GFP-expressing CD4<sup>+</sup> C7 and C24 cells in the dLN, liver and spleen at day 1, 2, 3 and 6 p.i.. Black and red FACS plots represent C7 and C24 CD4<sup>+</sup> T cells, respectively. (D) Frequency of GFP<sup>+</sup> C7 or C24 cells in the dLN, liver and spleen at the indicated time-points. Data are pooled from three independent experiments with similar trends; Data shown are the mean percentage ± sem (n > 8 mice / group / time point). Symbols or lines in black and red represent C7 and C24 cells, respectively. Statistical differences between C7 and C24 cells were determined by Student's t-test (\*p<0.05, \*\*p < 0.01).

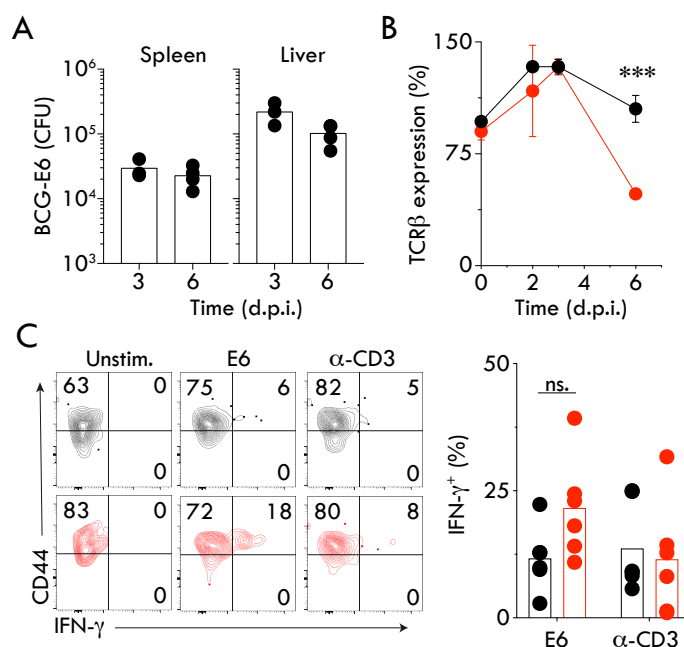

**Figure. S1. TCR downregulation in high affinity C24 cells does not affect antigen reactivity *ex vivo* and the distribution of BCG-E6 following i.v. infection.**

(A) Bacterial loads in the spleen and liver of B6 mice (without the transfer of TCR Tg CD4<sup>+</sup> T cells) assessed at day 3 and 6 after i.v. BCG-E6 inoculation (n = 4 mice / time-point). (B-C) C7 and C24 CD4<sup>+</sup> cells were transferred i.v. into naive B6 recipients 1 day prior to i.v. inoculation with BCG-E6. (B) Flow cytometric analysis of TCRβ expression on C7 and C24 cells in the spleens of mice at the indicated time-points. TCRβ expression on TCR Tg cells is represented as a percentage relative to the MFI of TCRβ on endogenous CD44<sup>-</sup>CD4<sup>+</sup> T cells. Data are representative of three independent experiments. Symbols denote group means and bars show sem (n = 3 mice / group). (C) CD44 and IFN-γ expression in C7 and C24 cells from the spleens of mice 6 days after i.v. inoculation with BCG-E6. Splenocytes were left unstimulated or re-stimulated for 5 h with either the E6 peptide (1 μg/mL) or soluble agonistic anti-CD3 mAb (1 μg/mL) in the presence of BFA. Representative FACS plots and summary graphs of pooled data from two experiments are shown (n = 6 mice / group). Symbols denote individual mice and the open bars represent group means. Black and red flow cytometry plots or symbols represent C7 and C24 cells, respectively. Statistical differences between C7 and C24 cells were determined using the Student's t test (p\*\*\* < 0.001).



124 polyclonal anti-CD3 *ex vivo* (Fig. S1C). These data indicate that TCR downregulation on C24 cells  
125 minimally affects their ability to recognize cognate antigens.

126

### 127 **High affinity CD4<sup>+</sup> T cells undergo accelerated activation, proliferation and differentiation**

128 To investigate whether the accelerated and greater expansion of high affinity C24 cells resulted  
129 from their enhanced activation and cell division, we first examined the kinetics of T cell activation  
130 and proliferation *in vivo* after adoptive T cell transfer and BCG-E6 infection. A greater fraction of  
131 C24 cells upregulated the activation markers CD44 and CD25 than lower affinity clones at day 2  
132 in the spleen (Fig. 2A). By day 3, however, high and low affinity T cells expressed similar levels  
133 of CD44. Elevated CD25 expression on CD4<sup>+</sup> T cells was transient, with CD25 expression  
134 returning to negligible levels by day 6 p.i., irrespective of TCR affinity.

135 Consistent with their increased activation, the majority of high affinity C24 cells had  
136 undergone at least one additional division when compared to their lower affinity counterparts at  
137 day 3 p.i. *in vivo* (Fig. 2B). The enhanced cell cycling of high affinity T cells was further  
138 demonstrated by an increased percentage of Ki-67<sup>+</sup> C24 cells in the spleen (Fig. 2C). Mathematical  
139 modelling based on the fraction of divided cells over time (8, 23, 24) (Fig. S2A) estimated that  
140 high affinity C24 cells entered cell division 6 h earlier than their lower affinity C7 counterparts *in*  
141 *vivo* (Fig. 2D, 65 h vs. 71 h). One of the hallmarks of the immune response to mycobacterial  
142 infection is the generation of Th1 cells. When compared to lower affinity C7 cells, a greater  
143 proportion of high affinity C24 cells upregulated T-bet and the Th1-associated chemokine receptor  
144 CXCR3 at day 2 p.i. (Fig. 2E). However, these differences were eventually diminished at later  
145 time points in the spleen (Fig. 2F). Together with the activation kinetics, these findings reveal that  
146 the impact of TCR signal strength on Th1 activation and differentiation is time dependent.

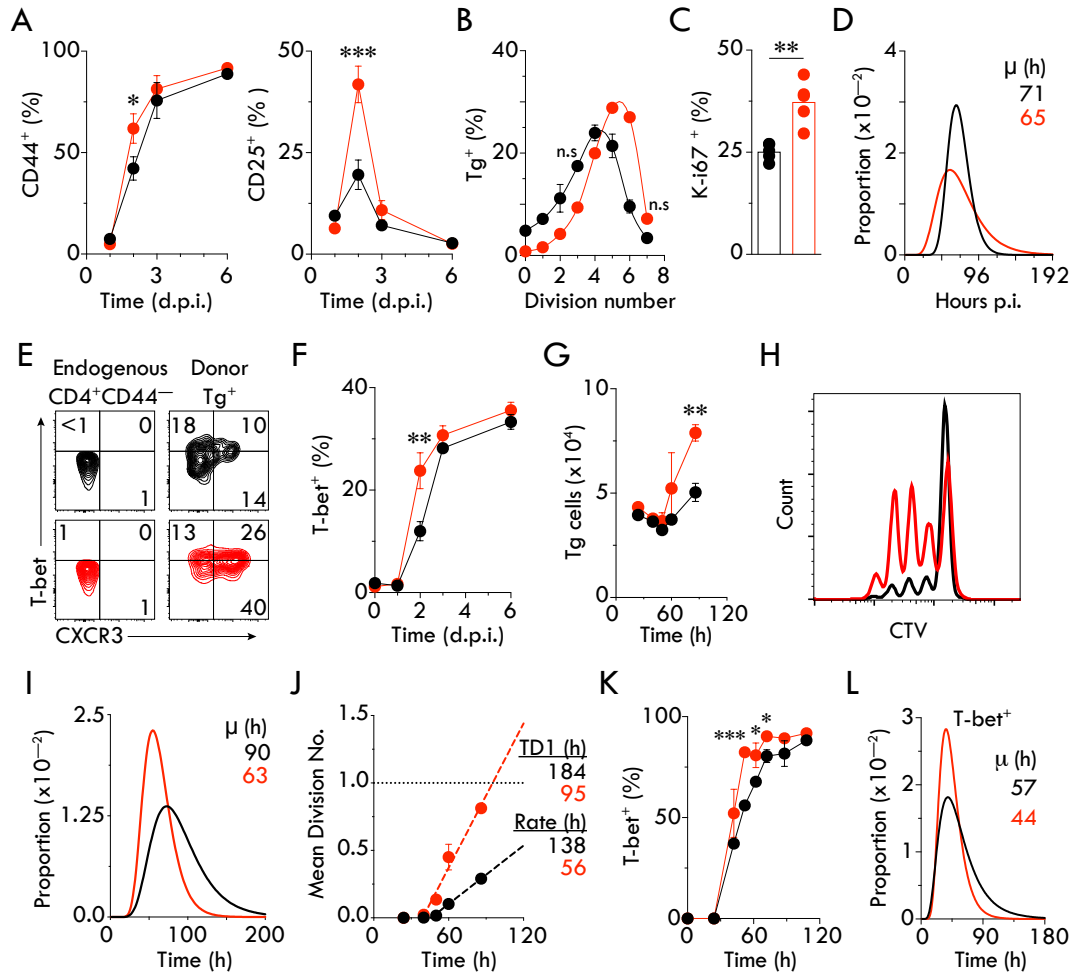

**Figure 2. Strong TCR signaling accelerates the activation, proliferation and differentiation of Th1 cells.**

(A-F) CTV-labelled C7 and C24 cells were transferred into naive B6 recipients 1 day prior to inoculation with BCG-E6. The activation and proliferation of TCR Tg cells in the spleen was determined using flow cytometry. (A) Flow cytometric analysis of CD44 and CD25 expression on C7 and C24 cells at the indicated time-points. Data are pooled from at least three independent experiments with similar trends. Data shown are the mean percentage  $\pm$  sem ( $n > 10$  mice / group / time point). (B) Frequency of Tg cells in each division 3 d.p.i. determined by flow cytometry. Data are representative of four independent experiments with similar results. Symbols and bars denote the group mean  $\pm$  sem ( $n = 3$  mice / group), respectively. The difference in the proportion of C7 and C24 cells in each division was statistically significant (at least  $p < 0.05$ ) for all division numbers, unless indicated otherwise. (C) Percentage of Ki-67-expressing Tg cells in the spleen 3 days after BCG-E6 inoculation determined by flow cytometry. Closed circles represent individual mice and bars denote the group mean. Data are representative of two independent experiments with similar results ( $n = 4$  mice / group). (D) Time to first division determined by CTV dilution *in vivo*. Best-fit log normal probability distribution describing the mean time to first division (C7:  $\mu = 71.1$  h, sd. = 0.2 h; C24:  $\mu = 65.2$  h, sd. = 0.2 h). Data are representative of two independent experiments ( $n = 5$  mice / group). (E) Flow cytometric analysis of T-bet and CXCR3 expression in donor TCR Tg cells (GFP<sup>+</sup>CD4<sup>+</sup>) at 2 d.p.i.. Endogenous naïve CD4<sup>+</sup> cells (GFP<sup>-</sup>CD4<sup>+</sup>CD44<sup>-</sup>) within the same recipient spleen were used as controls. (F) Percentage of T-bet expression at indicated time points p.i.. Data are pooled from three independent experiments. Symbols and bars denote the group mean  $\pm$  sem (3-10 mice / group). (G-L) Purified C7 and C24 Tg cells were CTV-labelled and cultured with CD4-depleted splenocytes isolated

from naïve B6 mice in the presence of IL-12 (5 ng/mL), anti-IL-4 (10 µg/mL), anti-IFN-γ (10 µg/mL) and the E6 peptide (0.05 µg/mL). **(G)** Accumulation of C7 and C24 Tg cells *in vitro*. Data shown are the mean numbers ± sd of triplicate cultures and representative of three independent experiments. **(H)** Representative flow cytometry plot of CTV dilution in C7 and C24 Tg cells at 60 h. **(I)** Time to first division determined by CTV dilution *in vitro*. Best-fit log normal probability distribution describing the mean time to first division (C7:  $\mu = 89.73$  h, sd. = 1.62 h; C24:  $\mu = 62.89$  h, sd. = 1.55 h). **(J)** The mean division number (MDN) of precursor C7 and C24 cells at each time point was fitted with a linear regression (C7:  $y = 0.007224x - 0.3307$ ; C24:  $y = 0.01784x - 0.6994$ ). The time to first division is calculated by solving for x (time), when the MDN = 1 (C7 = 184.21 h, C24 = 95.26 h). The reciprocal of the slope provides an estimate of the rate of cell division (C7 = 138.43 h, C24 = 56.05 h). **(K)** Kinetic analysis of T-bet expression in C7 and C24 T cells by flow cytometry. Data shown are the mean percentage of T-bet<sup>+</sup> Tg cells ± sd of triplicate cultures and representative of three independent experiments. **(L)** Quantification of T-bet induction time in Tg cells *in vitro*. Best-fit log normal probability distribution describing the mean time to T-bet expression (C7:  $\mu = 56.5$  h, sd. = 1.4 h; C24:  $\mu = 44.2$  h, sd. = 1.6 h). Lines and symbols that are black or red represent C7 and C24 cells, respectively. Statistical differences between C7 and C24 cells were determined by Student t-test analysis (\*p<0.05, \*\*p < 0.01, \*\*\*p < 0.001, ns., not statistically significant).

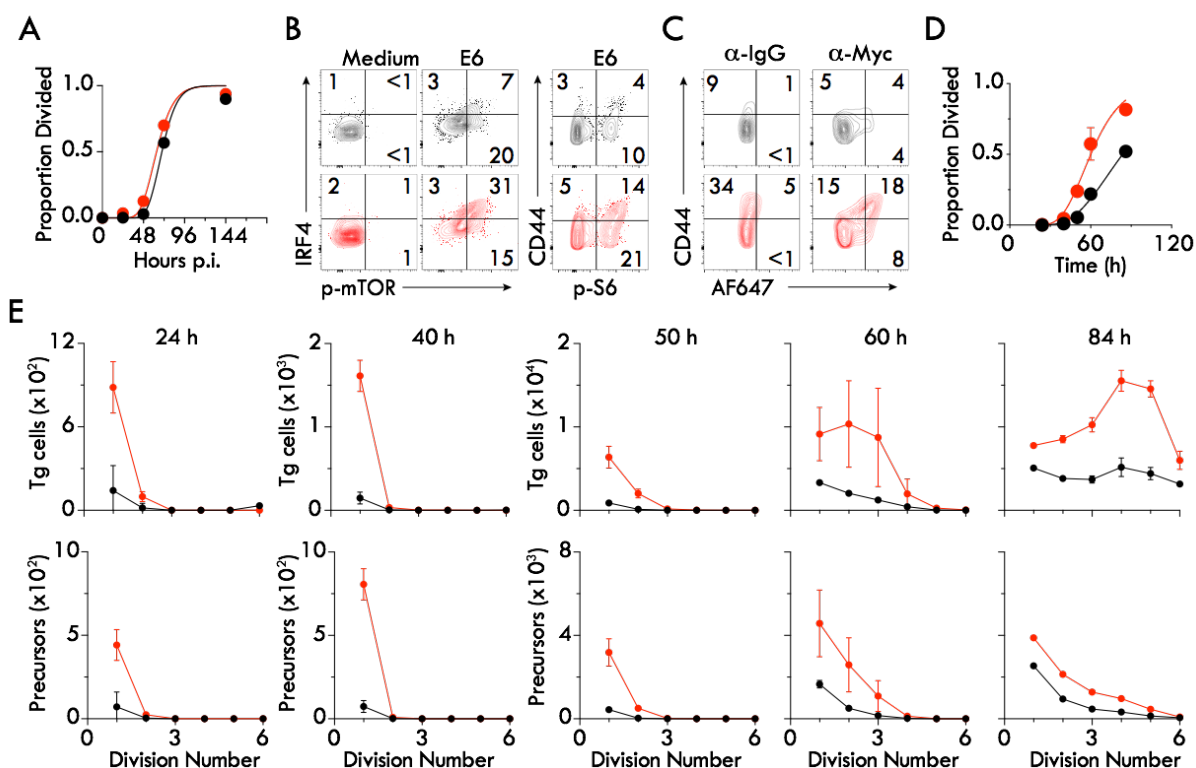

**Figure. S2. T cell activation and modelling of cell division kinetics.**

(A) C7 and C24 CD4<sup>+</sup> cells were transferred i.v. into naive B6 recipients 1 day prior to i.v. inoculation with BCG-E6. At each time-point, the average proportion of undivided C7 and C24 cells in the dLN, liver and spleen were determined using flow cytometry, and fitted with an inverted cumulative lognormal distribution (C7:  $\mu = 4.243$ ,  $sd. = 0.1989$ ; C24:  $\mu = 4.148$ ,  $sd. = 0.2441$ ) and used to estimate the best fit log normal distribution describing the time to first division (Fig. 2D). Lines and symbols that are black or red represent C7 and C24 cells, respectively. Data shown are representative of two independent experiments with similar results. Symbols denote the group mean ( $n = 3 - 4$  mice / group). (B-E) CTV-labelled C7 and C24 CD4<sup>+</sup> T cells were cultured with CD4-depleted splenocytes in the presence of IL-12, and anti-IL-4 and anti-IFN- $\gamma$  mAbs, with or without E6 peptide. (B) Flow cytometric analysis of IRF4 and phosphorylated mTOR (p-mTOR), CD44 and phosphorylated ribosomal S6 (p-S6) at 24 h. (C) Expression of CD44 and Myc 24 h after peptide activation was assessed by incubating C7 and C24 cells with either anti-Myc or rabbit IgG isotype control primary antibodies prior to staining with anti-rabbit IgG conjugated to AF647. Flow cytometry plots that are black or red represent C7 and C24 cells, respectively. Data shown are representative of two independent experiments with similar results. (D) The proportion of undivided C7 and C24 cells at each time point was calculated and was fitted with an inverted cumulative lognormal distribution (C7:  $\mu = 4.427$ ,  $sd. = 0.3736$ ; C24:  $\mu = 4.09$ ,  $sd. = 0.3013$ ) and used to estimate the best fit log normal distribution describing the time to first division. Lines and symbols that are black or red represent C7 and C24 cells, respectively. Data shown are representative of two independent experiments with similar results. Symbols denote the mean and bars represent the sd of triplicate cultures. (E) The number of C7 and C24 cells used to calculate their respective precursor cohorts in each division at the indicated time points was determined by flow cytometric analysis of CTV profiles and counting beads. The numbers in division 0 were excluded to better highlight time-dependent progression through division numbers. (D-E) Data shown are representative of three independent experiments with similar results. Lines and symbols that are black or red represent C7 and C24 cells, respectively. Symbols denote the mean and the error bars show the sd. of triplicate cultures.

147           The quantification of T cell proliferation, expansion and differentiation kinetics *in vivo* is  
148    confounded by the egress and recirculation of activated lymphocytes. To circumvent these inherent  
149    limitations, we developed an *in vitro* system where CTV-labelled Tg T cells were co-cultured with  
150    CD4<sup>+</sup> T cell-depleted WT splenocytes, E6 peptide, and recombinant IL-12. In addition, as IFN- $\gamma$   
151    enhances the Th1 response *in vitro* (25, 26) but not *in vivo* (27), we included an IFN- $\gamma$  neutralizing  
152    antibody in all the cultures to exclude the role of auto/paracrine IFN- $\gamma$  in Th1 differentiation.

153           Recapitulating our findings *in vivo*, high affinity C24 cells underwent greater population  
154    expansion (Fig. 2G), as well as accelerated cell division (Fig. 2H) and activation (Fig. S2B) when  
155    compared to low affinity C7 cells *in vitro*. At 24 h a greater fraction of high affinity C24 cells  
156    expressed molecules associated with early T cell activation, proliferation and metabolic programs,  
157    including IRF4 and phosphorylated mTOR (p-mTOR) as well as their downstream target, p-S6  
158    (Fig. S2B). The enhanced activation was also associated with elevated c-myc levels in undivided  
159    C24 cells (Fig. S2C). As the extent of c-myc expression in undivided cells can control the number  
160    of times a cell divides before it senesces (28), these findings collectively indicate that high affinity  
161    TCRs accelerate the activation of proliferative and metabolic programs.

162           Employing the same mathematical modelling used to determine the time to first division  
163    *in vivo*, we estimated that high affinity C24 cells entered their first division approximately 27 h  
164    earlier than low affinity C7 cells *in vitro* (63h vs. 90h, Fig. 2I) (Fig. S2D). One caveat associated  
165    with this quantification method is that it does not account for how a twofold increase in the number  
166    of cells per division would affect the relative ratio of divided and undivided cells over time (8).  
167    Therefore, we utilized another well-described method that accounts for the effect of cell division  
168    on the total cell number to validate our findings above (8). This method allowed us to track a cohort  
169    of cells through different divisions and time-points (Fig. S2E). By calculating the time when the

170 mean division number of a population of precursors is equivalent to 1, the modelling revealed that  
171 higher affinity C24 cells took 95 h to enter their first division compared to 184 h for C7 cells (Fig.  
172 2J). Additionally, high affinity TCR signaling reduced the time it took to complete successive  
173 divisions (56 h vs. 138 h) (Fig. 2I). Therefore, in addition to reducing the time to first division, our  
174 data revealed that high TCR affinity also accelerates the rate of proliferation to enhance the  
175 expansion of CD4<sup>+</sup> T cell populations. Similar to our *in vivo* findings, high affinity C24  
176 populations acquired T-bet earlier than their lower affinity counterparts *in vitro* (Fig. 2K).  
177 Mathematical modelling estimated that T-bet was upregulated in high affinity C24 populations 13  
178 h earlier than lower affinity C7 cells (Fig. 2L). These data collectively indicate that CD4<sup>+</sup> T cells  
179 with higher affinity TCRs undergo accelerated cell division and Th1 lineage commitment.

180

### 181 **TCR affinity determines the timing of IL-12-dependent Th1 commitment**

182 Multiple cytokines have been shown to contribute to the development of Th1 cells. In this regard,  
183 IL-12 is essential for Th1-dependent immunity against mycobacterial infection in both mice (29)  
184 and humans (30). Previous work has suggested that TCR signal strength also plays a role in the  
185 acquisition of the Th1 phenotype (12, 19). To examine the relative contribution of TCR versus  
186 cytokine signaling in Th1 differentiation, we first compared the kinetics of T-bet induction in high  
187 and low affinity CD4<sup>+</sup> T cells after E6 peptide-stimulation in the presence or absence of exogenous  
188 IL-12 *in vitro*. We found that in the absence of IL-12 (in which TCR signaling is the major driver  
189 of differentiation), T-bet was only upregulated to an intermediate level in the majority of T cells  
190 (Fig. 3A). Kinetic analysis revealed that TCR stimulation alone failed to generate T-bet<sup>high</sup> (T-  
191 bet<sup>hi</sup>) T cell populations regardless of TCR affinity (Fig. 3B). However, the inclusion of exogenous  
192 IL-12p70 significantly increased the percentage of T-bet<sup>hi</sup> populations in both low and high affinity

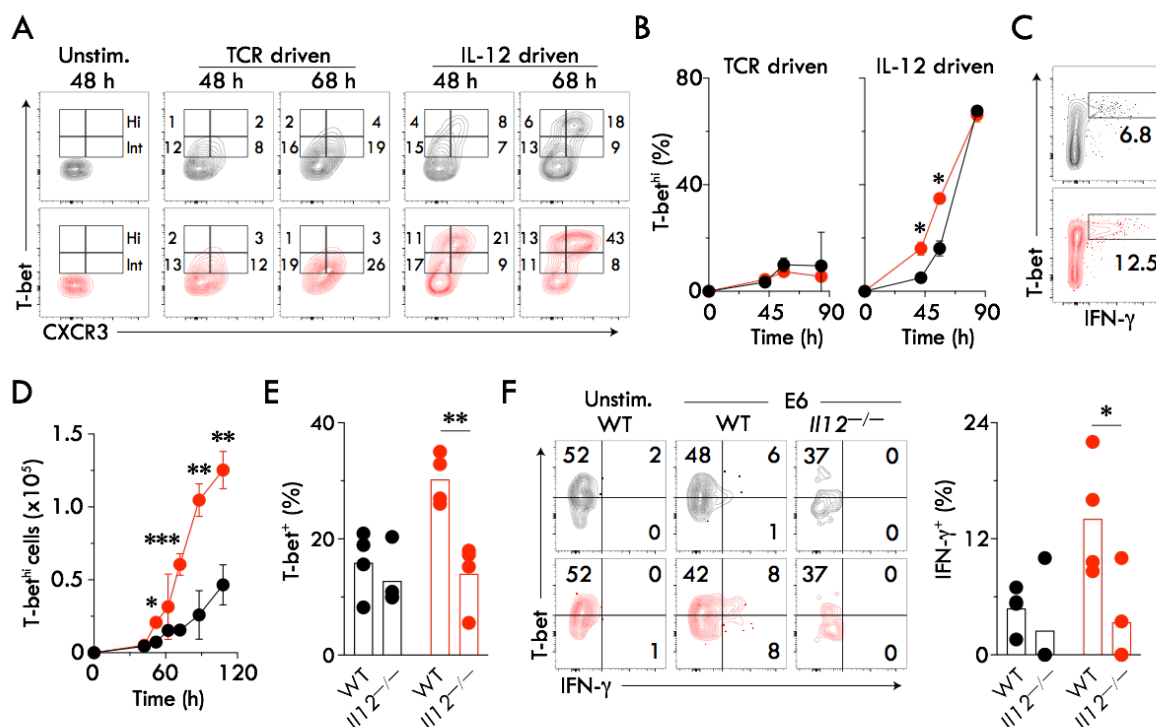

**Figure 3. High affinity TCRs accelerate the IL-12-dependent generation of Th1 effector populations.**

(A-D) Purified C7 and C24 CD4<sup>+</sup> Tg cells were cultured with CD4-depleted splenocytes from naïve B6 mice in the presence or absence of E6 peptide. In some E6-stimulated cultures, mAbs to IL-12p70, IL-4 and IFN- $\gamma$  were added (TCR-driven). In others, mAbs to IL-4 and IFN- $\gamma$ , together with recombinant IL-12p70, were included (IL-12-driven). (A) Flow cytometry plots showing the levels of T-bet expression in Tg cells in the absence (TCR-driven) or presence of IL-12 (IL-12-driven). (B) Changes in the percentage of T-bet high (T-bet<sup>hi</sup>) cells under different polarization conditions analysed by flow cytometry. Data shown are the mean percentage of T-bet<sup>hi</sup> Tg cells  $\pm$  sd of triplicate cultures. (C) Representative flow cytometry plot showing intracellular IFN- $\gamma$  expression in T-bet<sup>hi</sup> cell populations. E6 peptide-activated C7 and C24 T cells were cultured under IL-12 driven culture conditions for 66 h and intracellular T-bet and IFN- $\gamma$  expression was analyzed without further re-stimulation. BFA was added to the culture 6h before analysis. (D) Expansion of T-bet<sup>hi</sup> Tg cell populations in the presence of IL-12, anti-IL-4 and anti-IFN- $\gamma$ . Data shown are the mean numbers of T-bet<sup>hi</sup> Tg cells  $\pm$  sd of triplicate cultures. (E-F) Purified CD4<sup>+</sup> T cells from C7xGFPx*Rag1*<sup>-/-</sup> or C24xGFPx*Rag1*<sup>-/-</sup> mice were transferred i.v. into separate naïve B6 or *Il12p40*<sup>-/-</sup> recipients 1 day prior to i.v. inoculation with BCG-E6. Data are representative of two independent experiments with similar results (4 mice / group). Symbols denote individual mice and open bars represent group means. (E) Proportion of C7 and C24 cells that express T-bet in the spleen at day 2 p.i.. (F) Representative flow cytometry plots and summary data showing the percentage of IFN- $\gamma$  expressing Tg cells in the liver 6 d.p.i.. Hepatic leukocytes were re-stimulated in the presence or absence of E6 peptide (1  $\mu$ g/mL) for 5 h *ex vivo* before flow cytometry analysis. For all data, the lines, symbols or FACS plots in black and red represent C7 and C24 cells, respectively. Data are representative of three independent experiments with similar results. In (E) and (F), closed circles represent individual mice and bars denote the group mean. Statistical differences between C7 and C24 cells were determined by Student t-test analysis, (\* $p$ <0.05, \*\* $p$ <0.01, \*\*\* $p$ <0.001).

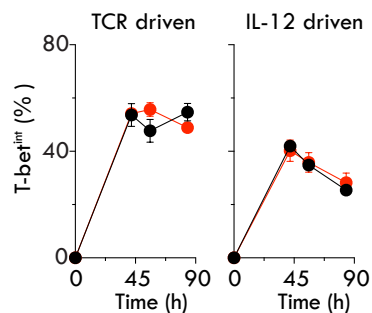

**Figure. S3. Kinetic analysis of intermediate T-bet-expressing T cell populations.**

Purified C7 and C24 CD4<sup>+</sup> T cells were cultured with CD4-depleted splenocytes in the presence or absence of E6 peptide (0.05  $\mu\text{g}/\text{mL}$ ), and exposed to TCR-driven (anti-IL-12p70, anti-IL-4 and anti-IFN- $\gamma$  mAbs) or IL-12-driven (5 ng/mL IL-12p70 and anti-IFN- $\gamma$  and anti-IL-4 mAbs) culture conditions. C7 and C24 populations expressing intermediate levels of T-bet (T-bet<sup>int</sup>) was determined by flow cytometry at the indicated time points. Data are representative of two independent experiments with similar results. Lines and symbols that are black or red represent C7 and C24 cells, respectively. Symbols denote the mean and the error bars show the sd. of triplicate cultures.



193 T cell cultures, with the increase accelerated in the latter cultures (Fig. 3A & B). As expected,  
194 CXCR3 induction was closely correlated with T-bet expression. When intracellular cytokine  
195 expression was evaluated without further re-stimulation, we observed that IFN- $\gamma$  was  
196 predominantly expressed by the cells expressing the highest levels of T-bet, suggesting that T-bet<sup>hi</sup>  
197 cells represent terminally differentiated Th1 effector populations. Importantly, there was an  
198 increased accumulation of IFN- $\gamma$  expressing cells in C24 compared to C7 cultures, suggesting that  
199 high TCR affinity accelerates the generation of IL-12-dependent Th1 effectors (Fig. 3C). Kinetic  
200 analysis revealed that the IL-12 dependent generation of T-bet<sup>hi</sup> cells occurred at the expense of  
201 T-bet<sup>int</sup> populations (Fig. S3), irrespective of TCR affinity, such that high affinity TCR signals  
202 resulted in the generation of 3 – 4-fold more T-bet<sup>hi</sup> effectors than their low affinity counterparts  
203 (Fig. 3D). Although IL-2 has been shown to enhance Th1 differentiation (31), the inclusion of IL-  
204 2 neutralizing antibodies or the addition of exogenous IL-2 did not affect T-bet expression in our  
205 system (Fig. S4). These findings suggest that although TCR signals alone can induce T-bet  
206 expression, strong TCR signals cannot replace the requirement of IL-12 in the generation of fully  
207 differentiated T-bet<sup>hi</sup> Th1 effectors.

208 To examine whether IL-12 plays a role in determining the Th1 phenotype of low and high  
209 affinity CD4 T cells *in vivo*, C7 and C24 cells were adoptively transferred into WT or *Il12p40*-  
210 deficient (*Il12*<sup>-/-</sup>) recipient mice, and T-bet expression in donor T cells was assessed following  
211 BCG-E6 infection. In contrast to WT recipients, T-bet was not upregulated in the donor TCR Tg  
212 T cells in the spleens of *Il12*<sup>-/-</sup> recipient mice regardless of TCR affinity (Fig. 3E). Notably, CD4<sup>+</sup>  
213 T cells with high affinity TCRs failed to display expedited T-bet upregulation in the spleen at day  
214 2 p.i. Similarly, we found that the enhanced ability of the high affinity CD4<sup>+</sup> T cell populations to  
215 express IFN- $\gamma$  in response to peptide re-stimulation *ex vivo* was compromised if they were

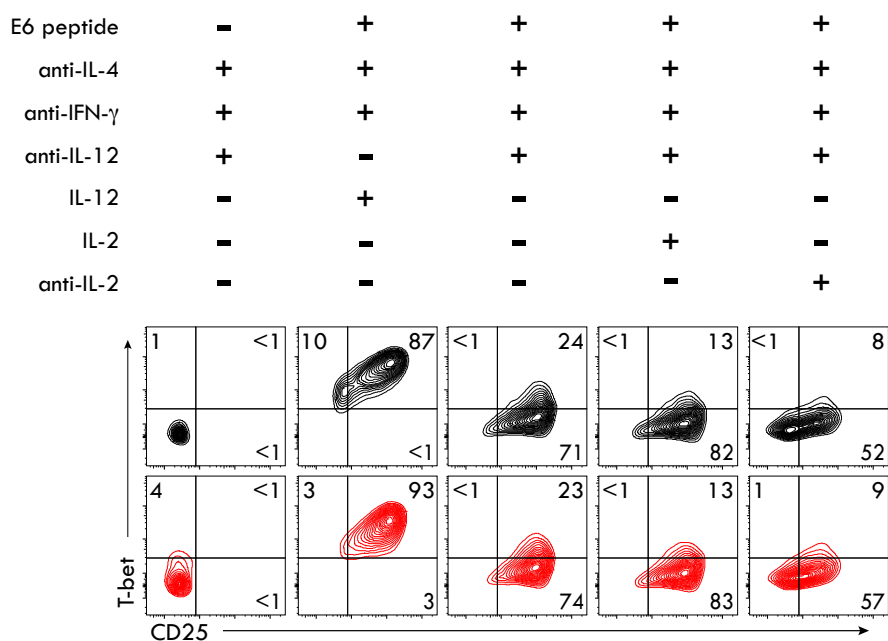

**Figure. S4. IL-2 minimally affects T-bet expression *in vitro*.**

Purified C7 and C24 CD4<sup>+</sup> T cells were cultured with CD4-depleted splenocytes in the presence or absence of E6 peptide (0.05  $\mu$ g/mL). Where indicated the T cells were incubated anti-IL-12p70, anti-IL-4, anti-IL-2 and anti-IFN- $\gamma$  mAbs, IL-12 and IL-2. T-bet and CD25 expression was analysed at 72 h following stimulation. Flow cytometry plots that are black and red represent C7 and C24 cells, respectively. Data are representative of two independent experiments with similar results.

216 transferred into BCG-infected *Il12<sup>-/-</sup>* recipients (Fig. 3F). These findings suggest that IL-12 but  
217 not TCR signals are critical for the generation of terminally differentiated Th1 effectors and that  
218 the lack of innate signaling cannot be compensated for by strong TCR signals.

219

220 **TCR affinity does not regulate the activation status or effector function of individual, divided**  
221 **CD4<sup>+</sup> T cells**

222 Although TCR affinity temporally regulates the magnitude and function of Th1 populations, it  
223 may not regulate the functional output at the level of individual T cells (24, 32, 33). One approach  
224 to address this possibility is to compare the mean fluorescence intensity (MFI) of molecules of  
225 interest in a given population using flow cytometry (34, 35). However, as low and high affinity T  
226 cells are activated with different kinetics (Fig. 2), simply comparing the MFI in bulk populations  
227 might skew the analysis in favor of higher affinity populations that have undergone greater  
228 division. Hence, we decided to approach this question by comparing the MFI of molecules on Tg  
229 cells in the same division.

230 Activated C7 and C24 T lymphocytes showed comparable expression of CD44, CD25,  
231 IRF4 and CXCR3, as well as a similar size when evaluated in the same division *in vitro* (Fig. 4A).  
232 This suggests that the activation status of Th cells is not intrinsically regulated by TCR affinity.  
233 Similarly, while IL-12 dose-dependent increases in the percentage of T-bet<sup>+</sup> cells were consistently  
234 more predominant in C24 than C7 cultures (Fig. 4B), T-bet levels in the two T cell populations in  
235 each cell division were comparable. In agreement with the findings shown above (Fig. 4A and B),  
236 enhanced T-bet expression was associated with cell cycle progression and the amount of  
237 exogenous IL-12 (Fig. 4C), confirming that TCR affinity controls the dynamics of the Th1  
238 response rather than lineage commitment decisions occurring at the level of individual T cells.

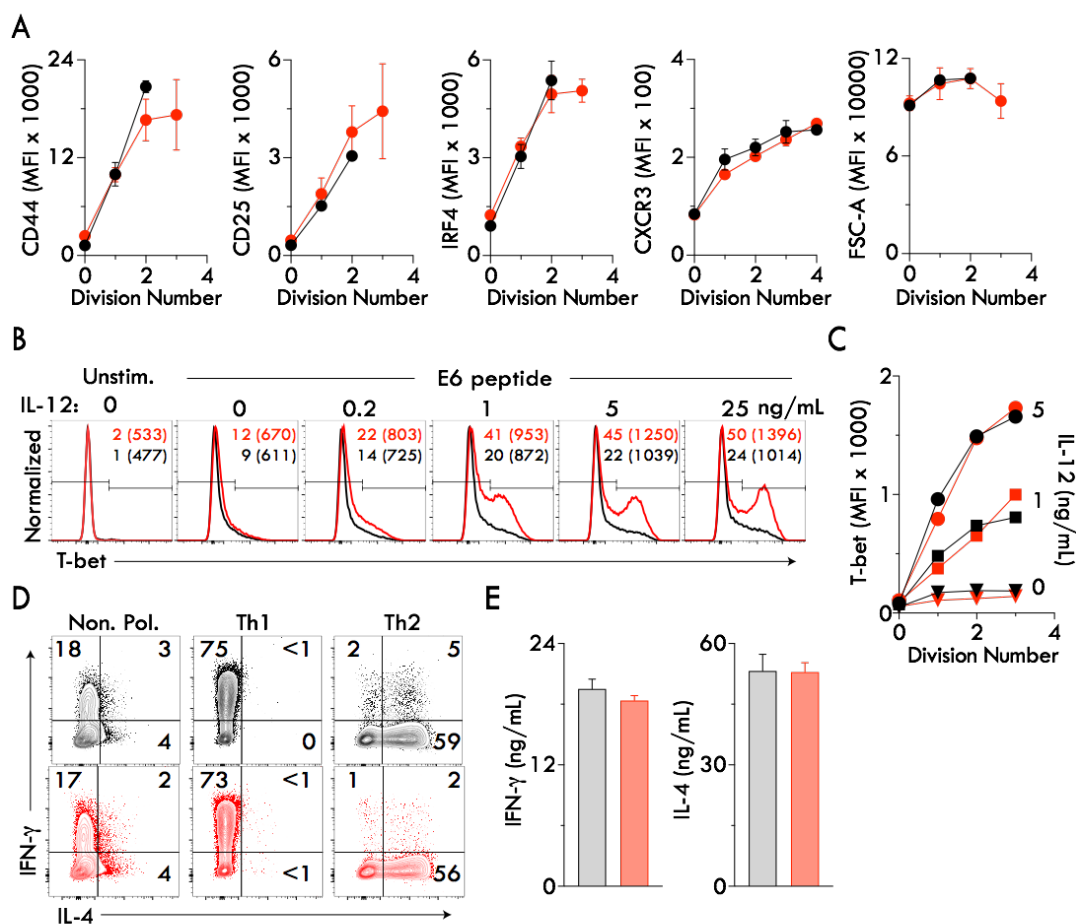

**Figure 4. TCR affinity does not determine the activation status or effector function of divided CD4<sup>+</sup> T cells.**

(A-C) CTV-labelled C7 and C24 Tg cells were stimulated with E6 peptide in the presence of recombinant IL-12p70 and anti-IFN- $\gamma$  mAb for 72 h. (A) Flow cytometric analysis of the MFI of CD44, CD25, IRF4 and CXCR3 as well as FSC-A (cell size) in each division of C7 and C24 populations at 42 h after peptide stimulation. (B-C) Tg cells were stimulated with E6 peptide in the presence of the graded concentrations of recombinant IL-12p70 and T-bet expression determined by flow cytometry. (B) T-bet expression in C7 and C24 Tg cell populations 60 h after stimulation. Numbers outside and within parentheses represent the percentage of T-bet<sup>+</sup> cells and the MFI of T-bet expression in T-bet<sup>+</sup> populations, respectively. (C) MFI of T-bet in each division of CTV-labelled C7 and C24 cells 66 h after stimulation. Data shown are representative of two independent experiments with similar results. (D-E) Purified C7 and C24 CD4<sup>+</sup> T cells were stimulated with E6 peptide under non-polarizing (anti-IL-12, anti-IFN- $\gamma$  and anti-IL-4 mAbs), Th1 (IL-12p70 with anti-IFN- $\gamma$  and anti-IL-4 mAbs) or Th2 (IL-4 with anti-IFN- $\gamma$  and anti-IL-12 mAbs) culture conditions for 96 h. Following expansion in IL-2-containing medium for 48 h, an equal number of T cells were re-stimulated with immobilized anti-CD3 in the presence (D) or absence (E) of BFA for 6 h. (D) Intracellular IFN- $\gamma$  and IL-4 expression under the indicated culture conditions was analyzed by flow cytometry. (E) Quantification of IFN- $\gamma$  and IL-4 produced by Th1 and Th2 Tg cells by Cytokine Bead Array. Data shown are the mean  $\pm$  the sd of triplicate cultures. For all data the bars, lines, symbols or FACS plots in black and red represent C7 and C24 cells, respectively.

239 Finally, low and high affinity T cells were equally susceptible to Th1 and Th2 polarization.  
240 Following priming with E6 peptide under non-polarizing, Th1 or Th2 culture conditions *in vitro*  
241 and re-stimulation with plate-bound anti-CD3 mAb, an equivalent proportion of C7 and C24 cells  
242 expressed the expected signature Th cytokines IFN- $\gamma$  and IL-4 (Fig. 4D). Importantly, when an  
243 equal number of cells were re-stimulated, C7 and C24 cell cultures produced comparable amounts  
244 of the signature cytokines, indicating that low and high affinity effector T cells have similar  
245 cytokine-producing potential at the per-cell level (Fig. 4E). These data indicate that TCR affinity  
246 itself does not intrinsically instruct the differentiation of CD4<sup>+</sup> T cells or determine their activation  
247 phenotype.

248

#### 249 **TCR signal-controlled IL-12R $\beta$ 2 upregulation is cell division-dependent**

250 To determine how IL-12 cooperated with TCR affinity to control the timing of Th1 polarization  
251 and ultimately the expansion of effector populations, we next examined whether TCR affinity  
252 regulated the expression of the signaling component of the IL-12R, IL-12R $\beta$ 2, which is known to  
253 be absent on naïve T cells (36). We found that when compared to lower affinity CD4<sup>+</sup> T cells, a  
254 greater fraction of high affinity T cells upregulated IL-12R $\beta$ 2 48 h after stimulation (Fig. 5A).  
255 While IL-12R $\beta$ 2 expression was elevated on both TCR Tg T cells over time, the upregulation was  
256 significantly accelerated in high affinity T cells leading to increased accumulation of T-bet<sup>hi</sup> cells  
257 in C24 cultures (Fig. 5B). Importantly, the number of IL-12R $\beta$ 2-expressing cells in high affinity  
258 C24 cell cultures was consistently more than double of that in C7 cultures after 60 h. Regardless  
259 of the strength of TCR signaling, IL-12R $\beta$ 2 was predominantly detected in T-bet-expressing cells  
260 (Fig 5A).

261

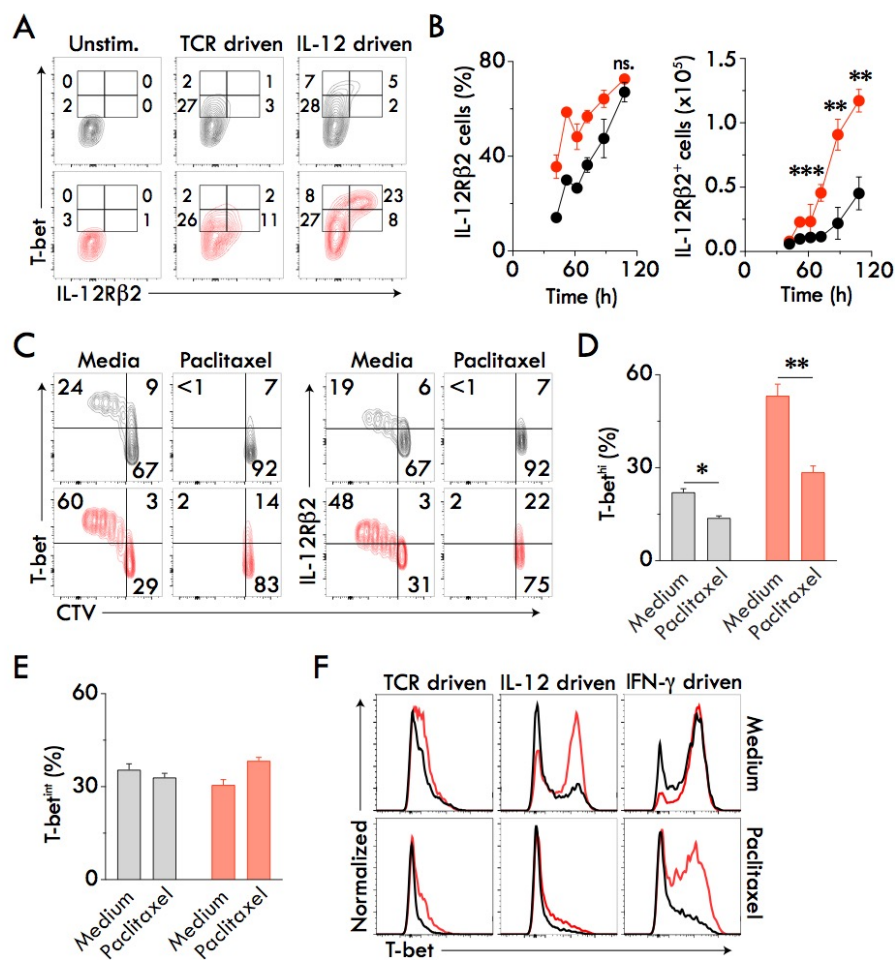

**Figure 5. TCR signal-driven IL-12Rβ2 upregulation is cell division-dependent.**

Purified C7 and C24 CD4<sup>+</sup> Tg cells were cultured with CD4-depleted splenocytes from naïve B6 mice in the presence or absence of E6 peptide. **(A)** Flow cytometry plots showing IL-12Rβ2 and T-bet expression in Tg cells 48 h after stimulation. In some E6-stimulated cultures, mAbs to IL-12p70, IL-4 and IFN-γ were added (TCR-driven) while in others, mAbs to IL-4 and IFN-γ, together with recombinant IL-12p70, were included (IL-12-driven). **(B)** Kinetic analysis of the percentage and absolute number of IL-12Rβ2-expressing Tg cells by flow cytometry. Data shown are the mean ± sd of triplicate cultures. Statistical differences between C7 and C24 cultures were determined by Students t-test (\*p<0.05, \*\*p<0.01, \*\*\*p<0.001, ns., not statistically significant). The difference in the proportion of IL-12Rβ2<sup>+</sup> C7 and C24 cells was statistically significant (at least p<0.05) for all time points, unless indicated otherwise. **(C-E)** CTV-labelled C7 and C24 T cells were stimulated with E6 peptide and IL-12 in the presence of anti-IL-4 and anti-IFN-γ mAbs. Where indicated, paclitaxel (200 nM) was added at the beginning of the cultures. **(C)** Flow cytometric analysis of T-bet and IL-12Rβ2 expression on CTV-labelled C7 and C24 cells 66 h after peptide stimulation. The percentage of **(D)** Tbet<sup>hi</sup> and **(E)** Tbet<sup>int</sup> populations in C7 and C24 cultures with or without paclitaxel examined by flow cytometry at 52 h after peptide stimulation. Bars that are black or red represent C7 and C24 populations, respectively. Data shown are mean ± sd of triplicate cultures. Statistical differences between untreated and paclitaxel-treated cultures were determined by Students t-test (\*p<0.05, \*\*p<0.01). **(F)** Flow cytometric analysis of the effect of paclitaxel treatment on IL-12 versus IFN-γ augmented T-bet expression. As specified, cells were exposed to TCR-driven (anti-IL-12p70, anti-IL-4 and anti-IFN-γ mAbs), IL-12-driven (5 ng/mL IL-12p70 and anti-IFN-γ and anti-IL-4 mAbs) or IFN-γ-driven (anti-IL-12p70, anti-IL-4 mAbs) culture conditions and analyzed at 66 h. All data are representative of at least two independent experiments with similar results.

262 As the kinetics of T-bet and IL-12R $\beta$ 2 induction mirrored that of T cell division (Fig. 2),  
263 we hypothesized that TCR affinity timed IL-12R $\beta$ 2 expression, and consequent Th1 lineage  
264 commitment, by regulating cell division. To test this, Tg CD4<sup>+</sup> T cells were stimulated with E6  
265 and IL-12p70 in the presence or absence of paclitaxel, a chemical known to inhibit the G2/M phase  
266 of the cell cycle (37). As expected, paclitaxel treatment effectively blocked the proliferation of C7  
267 and C24 cells (Fig. 5C). Supporting the key role of cell division in mediating IL-12R $\beta$ 2 expression,  
268 paclitaxel treatment also impaired the upregulation of IL-12R $\beta$ 2 and the subsequent expansion of  
269 T-bet-expressing cells. Importantly, paclitaxel treatment was found to selectively impair the  
270 generation of T-bet<sup>hi</sup> cells (Fig. 5D), with T-bet<sup>int</sup> populations being minimally affected (Fig. 5E).  
271 These data place cell division as a mechanism by which TCR affinity fine-tunes the speed of Th1  
272 differentiation. It is worth noting that this cell division-dependent mechanism is not universally  
273 utilized in Th cell differentiation. By excluding the anti-IFN- $\gamma$  monoclonal antibody from the  
274 culture, we found that chemical inhibition of cell division prevented IL-12, but not IFN- $\gamma$ -driven  
275 T-bet expression (Fig. 5F). This is likely due to the fact that in contrast to IL-12R $\beta$ 2, the IFN- $\gamma$   
276 receptor is constitutively expressed on naïve T cells (38, 39), and therefore, the effect of IFN- $\gamma$  on  
277 Th1 differentiation is independent of cell division.

278

279 **CD4<sup>+</sup> T cells with high affinity TCRs orchestrate accelerated anti-mycobacterial defense in**  
280 **non-lymphoid tissues**

281 CD8<sup>+</sup> T cells primed by low affinity antigens have been shown to egress from the spleen earlier  
282 than those stimulated by high affinity antigens following *L. monocytogenes* infection (9, 10).  
283 However, the role of TCR affinity in coordinating the egress of CD4<sup>+</sup> T cell egress from secondary  
284 lymphoid organs as well as their migration into non-lymphoid tissues is unknown. We first

285 assessed the anatomic localization of Tg CD4<sup>+</sup> T cells in the spleen of BCG-E6-infected mice on  
286 day 2 and 3 p.i.. At day 2 p.i., the majority of T cells, irrespective of TCR affinity, resided mainly  
287 within the T cell zone (Fig. 6A), with few GFP<sup>+</sup> Tg CD4<sup>+</sup> T cells being detected in the blood (Fig.  
288 6B). By day 3, however, high affinity C24 cells began to egress from the T cell zone, which  
289 correlated with their increased presence in B cell follicles and in the blood of recipient mice. In  
290 contrast, the majority of lower affinity C7 cells remained in the T cell zone.

291 T cells traffic from lymphoid tissues into peripherally infected non-lymphoid tissues where  
292 they perform their effector function. The chemokine receptor CXCR3 has been shown to be critical  
293 for T cell entry into inflamed peripheral tissues (40), and its optimal expression is dependent on  
294 T-bet (41, 42). Our data confirmed a strong correlation between the expression of T-bet and  
295 CXCR3 (Fig. 2E and 3A). Following the adoptive transfer of CTV-labelled TCR Tg CD4<sup>+</sup> T cells  
296 and i.v. infection with BCG, a greater proportion of CD4<sup>+</sup> T cells with high affinity TCRs  
297 expressed CXCR3 in the spleen when compared to those with lower affinity TCRs at day 2 p.i  
298 (Fig. 6C). By day 3 p.i, the proportion of CXCR3<sup>+</sup> T cells became comparable in C7 and C24  
299 populations, which could be due to the egress of high affinity CXCR3<sup>+</sup> C24 cells. Enhanced  
300 CXCR3 expression was positively correlated with T cell proliferation, which indicates that cells  
301 that have undergone multiple rounds of division are better equipped for peripheral tissue entry. To  
302 formally establish whether CXCR3 upregulation is dependent on T cell division, we assessed the  
303 expression of CXCR3 on peptide-activated, CTV-labelled TCR Tg T cells in the presence or  
304 absence of the cell division inhibitor paclitaxel *in vitro*. We confirmed that similar to T-bet, optimal  
305 CXCR3 upregulation appeared to be dependent on cell division (Fig. 6D). This suggests that cell  
306 division equips CD4<sup>+</sup> T cells with the chemokine receptor that increases their entry into infected  
307 non-lymphoid tissues, with the process temporally regulated by TCR affinity. The accelerated



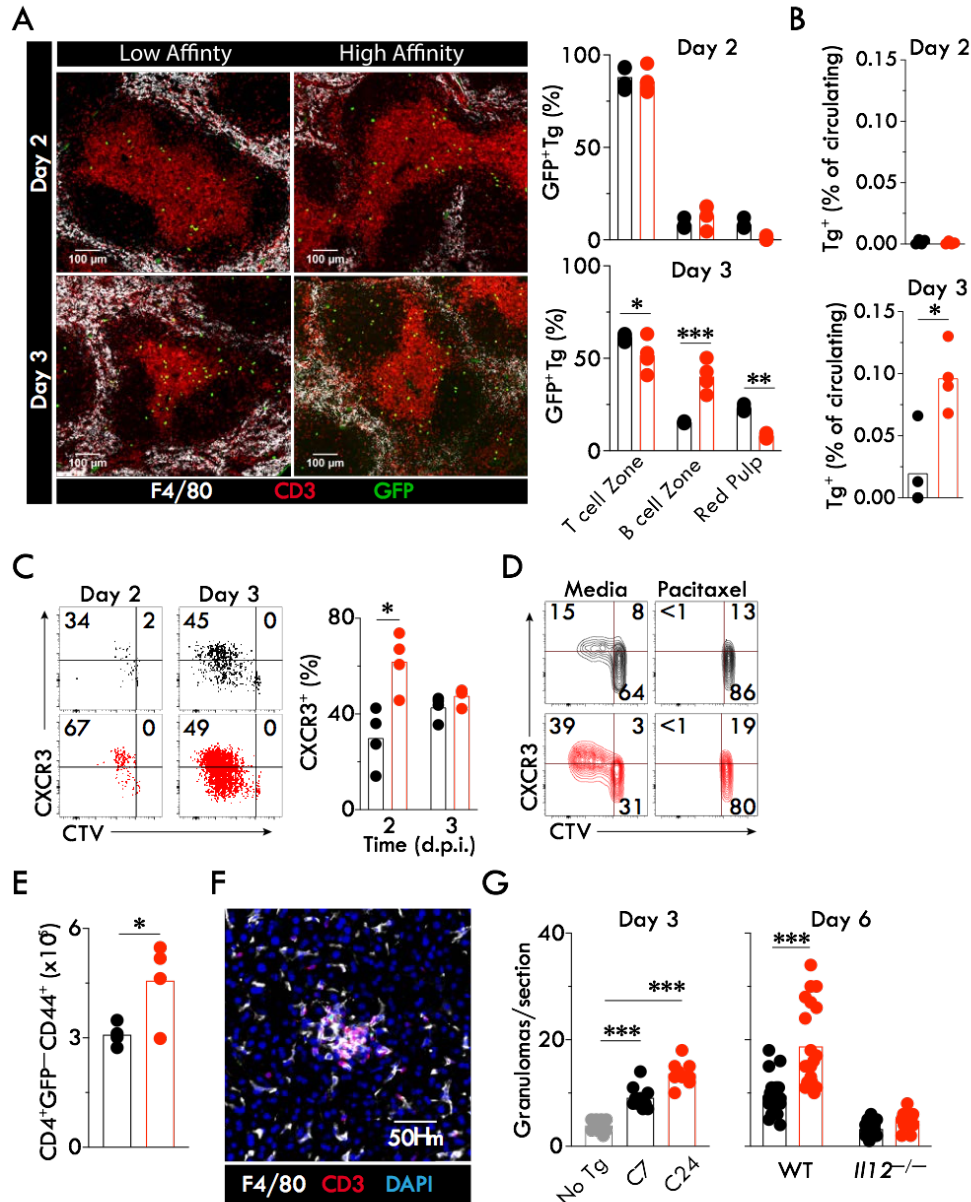

**Figure 6. High affinity TCRs accelerate Th1 cell egress from the spleen to expedite the anti-mycobacterial Th1 tissue response at the primary site of infection.**

CTV-labelled C7 and C24 CD4<sup>+</sup> cells were transferred into naive B6 recipients 1 day prior to BCG-E6 inoculation. Spleen, blood and liver samples were collected at the indicated time points. **(A)** Microscopic analysis and quantification of the intra-splenic localisation of GFP<sup>+</sup> Tg cells (green) in the red pulp (F4/80<sup>+</sup>, white), T cell zone (CD3<sup>+</sup>, red) and B cell zone (F4/80<sup>-</sup> and CD3<sup>-</sup>) at 2 and 3 d.p.i. Histograms depict the number of CD3<sup>+</sup>GFP<sup>+</sup> cells counted in anatomic site of the spleen. Each symbol represents the percentage of Tg cells per T cell zone, B cell zone or the red pulp of the total number of Tg cells counted in an entire section. Each closed circle denotes one section with bars representing group means. **(B)** Flow cytometric analysis of the frequency of C7 and C24 cells among total CD4<sup>+</sup> T cell populations in circulation at 2 and 3 d.p.i.. Closed circles denote individual mice and open bars represent group means. **(C)** Flow cytometric analysis of CXCR3 expression on C7 and C24 cells in the spleen at 2 and 3 d.p.i. Data are representative of two independent experiments with

similar results ( $n = 4$  mice / group). Closed circles denote individual mice and open bars represent group means. **(D)** Flow cytometric analysis of CXCR3 expression on CTV-labelled C7 and C24 T cells at 66 h after stimulation with E6 peptide, IL-12, and anti-IL-4 and anti-IFN- $\gamma$  mAbs, in the presence or absence of paclitaxel (200 nM). **(E)** The number of activated endogenous (GFP<sup>-</sup>CD44<sup>+</sup>) CD4<sup>+</sup> T cells in the livers of WT mice receiving C7 or C24 cells at 6 d.p.i.. Data are representative of two independent experiments with similar results ( $n = 4$  mice / group). **(F)** Fluorescent micrograph showing granulomatous aggregations of F4/80<sup>+</sup> (white) and CD3<sup>+</sup> (red) cells in the liver of BCG-E6-infected mice at 3 d.p.i.. **(G)** The enumeration of the total number of hepatic granulomas (CD3<sup>+</sup>DAPI<sup>+</sup>F480<sup>+</sup> aggregates) in BCG-E6-infected WT or *Il12p40*<sup>-/-</sup> mice. Each closed circle denotes the number of granulomas in an individual section, with twelve sections counted per group. Bars represent group means. Bars, symbols or FACS plots in black and red represent C7 and C24 cells, respectively. Statistical differences between C7 and C24 cells were determined using the **(A, G)** two-way ANOVA or by **(B, C, E)** the students t-test (\* $p < 0.05$ , \*\* $p < 0.01$ , \*\*\* $p < 0.001$ ).

308 egress of high affinity C24 cells from the spleen was associated with a greater influx of activated  
309 CD44<sup>+</sup> endogenous CD4<sup>+</sup> T cells into the liver (Fig. 6E), indicating that high affinity CD4<sup>+</sup> T cells  
310 promote the recruitment of endogenous CD4<sup>+</sup> T cells.

311         Following mycobacterial infection, a major function of effector Th cells is to organize the  
312 formation of granulomas, a key feature of the tissue response involved in containing the infection  
313 (43). Hepatic granulomas in BCG-infected mice are characterized as aggregates of F4/80<sup>+</sup>  
314 macrophages and CD3<sup>+</sup> lymphocytes (Fig. 6F), which gradually mature in size and number  
315 following i.v. BCG inoculation (44). While the number of granulomas in the livers of non-T cell  
316 transferred mice were low at day 3 p.i., this increased significantly in mice that received TCR Tg  
317 CD4<sup>+</sup> T cells (Fig. 6G). The number of granulomas in the livers of mice receiving C24 cells were  
318 significantly higher than those that received low affinity C7 cells, which is consistent with the  
319 observation that the egress of high affinity T cells from the spleen was accelerated (Fig. 6B).  
320 Finally, we demonstrated that the donor T cell-enhanced formation of hepatic granulomas is  
321 dependent on IL-12 regardless of TCR affinity (Fig. 6G). Together, these data reveal that TCR  
322 affinity coordinates T cell trafficking and accelerated host defense strategies within infected  
323 tissues.

324 **Discussion:**

325 Recent investigations have suggested that TCR signal strength (regulated intrinsically in T cells  
326 by TCR affinity, and extrinsically by the density of pMHC and co-stimulatory molecules on APCs)  
327 plays a key role in regulating T cell responses to a variety of infections. However, mechanisms  
328 underlying the T cell-intrinsic regulation of lymphocyte responses, particularly in CD4<sup>+</sup> T cells,  
329 are incompletely understood. In this regard, whether strong TCR signals could replace the  
330 requirement of environmental cues in imprinting the effector function of CD4<sup>+</sup> T cells was  
331 undefined. We reveal that TCR affinity neither quantitatively regulates the functional output nor  
332 directly determines Th1 lineage commitment in individual CD4<sup>+</sup> lymphocytes. Instead, by  
333 controlling cell division-dependent IL-12R expression, TCR affinity controls when T cells become  
334 sensitive to environmental cues, and tailor their effector function to the microbe encountered. We  
335 suggest that the primary function of TCR affinity in the CD4<sup>+</sup> T cell response to intracellular  
336 infection is to control the speed of Th1 differentiation and the magnitude of effector cell  
337 populations. Interestingly, a similar observation has been reported with CD8<sup>+</sup> T cells (32, 33, 45).  
338 This cell division-dependent mechanism also helps explain how the diverse processes of a T cell  
339 response, proliferation, differentiation and trafficking, are temporally synchronized by TCR  
340 signals.

341 The TCR affinity-regulated, time-dependent mechanism is particularly relevant to the  
342 understanding of host-pathogen interactions in diseases caused by persistent intracellular  
343 pathogens, such as *M. tuberculosis* and *Leishmania major*. These pathogens are slow-growing and  
344 can initiate a chronic infection with very small inoculants at the site of entry (46, 47). As shown  
345 by intravital imaging analysis, antigen presentation during mycobacterial infection is limited (44).  
346 Hence, CD4<sup>+</sup> T cells with high TCR affinity will have a significant advantage over their low

347 affinity counterparts in recognizing poorly expressed microbial peptides, and in receiving IL-12  
348 signals to stabilize the effector function of Th1 cells. Although antigen-affinity has previously  
349 been linked to the intra-splenic localization of CD4<sup>+</sup> T cells (12), whether TCR stimulation  
350 strength controls Th cell migration to infected peripheral tissues has not been investigated. Our  
351 analysis demonstrates that high affinity CD4<sup>+</sup> T cell populations infiltrate the liver earlier and in  
352 greater numbers, leading to an augmented granulomatous response critical for containing  
353 mycobacteria. Interestingly, this was associated with the increased recruitment of activated  
354 endogenous CD4<sup>+</sup> T cells, suggesting that an additional function of Th cells with high affinity  
355 TCRs is to enhance the recruitment of other pathogen-specific T cells to the site of infection. CD4<sup>+</sup>  
356 T cells with high affinity TCRs likely play a pivotal role in early pathogen containment because  
357 of their ability to undergo accelerated priming, clonal expansion, differentiation and trafficking to  
358 the site of infection. Although slower at entering cell division, once activated, low affinity CD4<sup>+</sup>  
359 T cells are equipped with effector functions that are indistinguishable from high affinity T cells.  
360 Therefore, the sequential activation of CD4<sup>+</sup> T cells with high and low affinity TCRs will not only  
361 provide robust but also sustained immunity against persistent pathogens.

362         This study establishes that TCR signals alone play a minimal role in instructing Th lineage  
363 commitment. This notion is further supported by the observation that peptide-activated low and  
364 high affinity CD4<sup>+</sup> T cells were equally capable of becoming Th2 cells when exogenous IL-4 was  
365 present. This finding seems to be unexpected because of the general belief that strong TCR signals  
366 promote Th1 differentiation, whereas weak signals favor the generation of Th2 cells (48, 49). It is  
367 possible that TCR pMHC binding affinity has a distinct function in Th differentiation compared  
368 to other TCR signal strength modulators, such as antigen dose or co-stimulatory molecules, as  
369 proposed previously (12). However, the discrepancy in the role of TCR affinity in instructing Th

370 differentiation between the current and previous studies could be reconciled if the temporal  
371 regulation of T cell responses by TCR signal strength was taken into account. Since the majority  
372 of previous studies have reported T cell responses at the population level, in bulk cultures, at a  
373 single time point or tissue, the spatiotemporal difference in the response of low and high affinity  
374 T cells may not have been captured. The enhanced Th1 response associated with strong TCR  
375 stimulation at a single time point reported previously could be due to the accelerated increase in  
376 activated cell populations rather than enhanced lineage specification in individual cells.

377         In agreement with our findings, a previous study has shown that by modulating antigen  
378 dose or costimulatory molecule expression, strong TCR signals enhance the expression of IL-  
379 12R $\beta$ 2 (18). We identified the upregulation of IL-12R $\beta$ 2 was dependent on cell division and timed  
380 by TCR signal strength, suggesting that cell division is an essential mechanism integrating intrinsic  
381 TCR signals and extrinsic environmental cues during Th1 differentiation. Consistent with a  
382 previous study (50), the upregulation of IL-12R $\beta$ 2 occurs late after T cell activation and is  
383 persistently expressed, suggesting that the cells remain susceptible to IL-12 instruction for a  
384 sustained time period. Our findings support a model where TCR signals are a digital 'switch' that  
385 grant individual Th1 cells the ability to receive the instructive and selective cytokine signals for  
386 terminal differentiation and the stability of effector cell populations (51, 52). Indeed, IL-12 is  
387 required for the maintenance of immunity against a variety of pathogens (53-56). However, it is  
388 worth noting that the cell division-dependent mechanism underlying Th1 differentiation may not  
389 be generalized for other Th subsets. For example, IL-4R $\alpha$ , constitutively expressed by naïve T  
390 cells, is transiently upregulated following TCR stimulation (57) but subsequently downregulated  
391 (57, 58). Therefore, the link between cell division and cytokine receptor expression may not be  
392 necessary for the differentiation of Th2 cells.

393           The critical requirement for environmental cues in instructing Th1 differentiation also  
394 suggests that the conclusions of studies investigating the role of TCR signal strength *in vivo* are  
395 likely influenced by the infection model. Th1 differentiation associated with strong TCR  
396 stimulation during infection with influenza virus, *L. monocytogenes* or Lymphocytic  
397 choriomeningitis virus (LCMV) (12, 13, 19) has been attributed to IL-2/STAT5 signaling (12, 20),  
398 due partly to persistent CD25 expression on CD4<sup>+</sup> T cells. While the role of IL-12 was not  
399 investigated in these studies, it is likely these pathogens activate distinct innate and adaptive  
400 immune responses compared to mycobacteria. IL-12 is only transiently or minimally produced  
401 following *L. monocytogenes* and LCMV infection (59). Moreover, IL-12 is either partially required  
402 (*L.monocytogenes* or influenza virus) or dispensable (LCMV) for Th1 differentiation *in vivo* (60-  
403 63). Importantly, in contrast to mycobacterial infection, host control of the above-mentioned  
404 microbes predominantly requires CD8<sup>+</sup>, rather than CD4<sup>+</sup> T cells (64-67). Interestingly, CD25 was  
405 only transiently upregulated in our model. It is possible that the IL-2/CD25 feed-forward loop  
406 required for the maintenance of CD25 expression on CD4<sup>+</sup> T cells is suppressed by  
407 mycobacterium-induced IL-12, as IL-12-dependent STAT4 activation and T-bet expression have  
408 been shown to suppress IL-2 production and IL-2R signaling (68, 69).

409           The findings reported emphasize the critical importance of TCR affinity in the timing and  
410 scaling of CD4<sup>+</sup> T lymphocyte responses. They also clarify the relative roles of TCR and IL-12  
411 signaling in Th1 differentiation. Recognizing cell division as the coordinator of distinct  
412 components of the CD4<sup>+</sup> T cell response unifies the mechanisms that determine potent Th1  
413 immunity. The presence of TCRs with distinct affinities for the same epitope within the immune  
414 repertoire ensures that immune surveillance against invading pathogens is rapid, sustained and  
415 independent of the level of antigen expression or stage of infection. CD4<sup>+</sup> T cells with high affinity

416 TCRs may orchestrate local immunity by recruiting and helping other immune populations, such  
417 as lower affinity helper and cytotoxic T cells, as well as B lymphocytes. Targeting mechanisms  
418 known to increase TCR signal strength, such as increasing co-stimulatory signals or modifying  
419 peptide and MHC binding affinity, may lead to the development of more effective vaccination  
420 strategies for protection against intracellular pathogens.



421 **Materials and Methods:**

422 **Mice**

423 Clone 7 (C7) and Clone 24 (C24) TCR transgenic (Tg) mice specific for ESAT-6<sub>1-20</sub> -  
424 IA<sup>b</sup> complexes (kindly provided by Drs Eric Pamer and Michael Glickman) were generated on a  
425 C57BL/6 (B6) background as previously published (22). C7 and C24 mice were subsequently bred  
426 with GFP-expressing B6 *Rag1*<sup>-/-</sup> mice to generate C7.*Rag1*<sup>-/-</sup>.GFP and C24. *Rag1*<sup>-/-</sup>.GFP  
427 mice, respectively. The TCR transgenic animals and *Il12p40*<sup>-/-</sup> mice were bred and maintained  
428 at the Centenary Institute Animal Facility. B6 recipient mice (6-8 weeks old) were purchased from  
429 Australian BioResources (Moss Vale, NSW, Australia).

430

431 **Mycobacterial growth and infection**

432 *M. bovis* BCG expressing a dominant epitope of the the 6 kDa Early Secretory Antigenic Target  
433 (ESAT-6) peptide (ESAT-6<sub>1-20</sub>, peptide sequence QQWNFAGIEAAASA) (termed BCG-E6) was  
434 generated using a method described previously (70). The bacterium was grown to log phase at  
435 37°C in Middlebrook 7H9 broth (BD Biosciences, North Ryde, NSW, Australia) supplemented  
436 with 10% albumin-dextrose-catalase (ADC), 0.5% glycerol, 0.05% Tween80 and 50 µg/mL of  
437 kanamycin and 50 µg/mL hygromycin (Sigma-Aldrich, North Ryde, NSW, Australia). BCG-E6  
438 was washed in PBS and injected intravenously (i.v.) into wild-type B6 or *Il12p40*<sup>-/-</sup> mice (10<sup>6</sup>  
439 colony forming units (CFU) / mouse). BCG numbers in inoculates and tissue homogenates were  
440 quantified as CFU using Middlebrook 7H11 agar (BD Biosciences) supplemented with oleic acid-  
441 ADC (OADC) and 0.5% glycerol.

442

#### 443 **Preparation of single cell suspensions from tissues**

444 Liver-draining lymph nodes and spleens were collected in RPMI 1640 supplemented with 2% FCS  
445 (RP2) and dissociated through 70  $\mu\text{m}$  strainers. For leukocyte cell isolations from the liver,  
446 euthanized mice were first perfused with 10 mL PBS, and the livers dissociated through a 70 $\mu\text{m}$   
447 strainer. After washing with PBS, Liver leukocytes were enriched using 35% Percoll (Cytiva,  
448 Marlborough, MA, USA). For blood leukocytes, up to 700  $\mu\text{L}$  of blood was collected via cardiac  
449 puncture into EDTA coated collection tubes (Greiner Bio-one, Kremsmünster, Austria). Peripheral  
450 blood mononuclear cells (PBMCs) were isolated by gradient centrifugation on Histopaque1083  
451 (Sigma-Aldrich). Erythrocytes in single cell suspensions were lysed with ACK lysis buffer. Cells  
452 were washed in RP2 prior to viable cells being counted using trypan blue exclusion on a  
453 haemocytometer.

454

#### 455 **Isolation, Labelling, Enrichment and Adoptive Transfer of TCR Tg CD4<sup>+</sup> T cells**

456 Lymph nodes (inguinal, axillary, brachial and mesenteric) and spleens were collected from C7x  
457 *Rag1*<sup>-/-</sup>xGFP or C24x *Rag1*<sup>-/-</sup>xGFP mice and macerated through a 70 $\mu\text{m}$  strainer to obtain  
458 single cell suspensions. Red blood cells were lysed using ACK Lysis Buffer (Thermo Fisher  
459 Scientific, North Ryde, NSW, Australia). Where indicated,  $2.5 \times 10^7$  cells/mL cells were  
460 subsequently labeled with 5  $\mu\text{M}$  Cell Trace Violet (CTV) (Thermo Fisher Scientific) in warm PBS  
461 supplemented with 0.1% FCS for 20 minutes in the dark at 37°C. CTV labelling was terminated  
462 by adding equal volumes of cold FCS. The cell suspensions were incubated with running buffer  
463 (PBS supplemented with 0.5% FCS and 2 mM EDTA) and L3T4 microbeads (Miltenyi Biotec,  
464 Maquarie Park, NSW, Australia) according to the manufacturer's instructions. CD4<sup>+</sup> T cell

465 fractions were isolated using the AutoMacsPro (Miltenyi Biotec). Enrichment of C7/C24 CD4<sup>+</sup> T  
466 cells was confirmed by flow cytometry with a purity of ~95%. CD4<sup>+</sup> T cells from female mice  
467 were washed in PBS, and 10<sup>5</sup> i.v. injected into B6 or *Il12p40*<sup>-/-</sup> mice 24 h before BCG-E6  
468 infection.

469

#### 470 ***In vitro* T cell culture**

471 CD4<sup>+</sup> T cells were cultured in RPMI 1640 medium supplemented with 10% FCS, 100 U/ml  
472 Penicillin, 100 µg/ml Streptomycin, 25 mM HEPES (Thermo Fisher Scientific) and 50 µM 2ME  
473 (RP10). CD4<sup>+</sup> T cell-depleted B6 splenocytes, prepared using the CD4 Positive Selection kit II  
474 (StemCell Technologies, Tullamarine, VIC, Australia), were used as antigen presenting cells.  
475 Purified CD4<sup>+</sup> T cells were added to splenocytes in a ratio of 1:4. Prior to the addition of CD4<sup>+</sup> T  
476 cells, splenocytes were cultured with E6<sub>1-20</sub> peptide (0.05 µg / mL, GenScript) in round-bottomed  
477 96 well plates (Corning) for 30 minutes at room temperature. Where indicated, IL-12 (0.2-25  
478 ng/mL, Thermo Fisher Scientific), IL-4 (10 ng/mL, PeproTech), human IL-2 (10 IU/mL,  
479 PeproTech), Paclitaxel (200 nM, Sigma-Aldrich), rat anti-mouse IFN-γ (10 µg/mL, clone  
480 XMG1.2), rat anti-mouse IL-4 (10 µg/mL, clone 11B11), rat anti-mouse IL-12p40/p70 (10 µg/mL,  
481 clone C17.8), rat anti-mouse IL-2 (10 µg/mL, clone S4B6) (all from BD Biosciences), were  
482 included in the cultures. For analysis of cytokine expression without re-stimulation, 1:1000 Golgi-  
483 plug (BD Biosciences) was added to the culture 5 h prior to flow cytometric analysis. For detection  
484 of intracellular cytokine expression after re-stimulation *ex vivo*, up to 5x10<sup>6</sup> leukocytes were  
485 incubated with 5 µg/mL E6 peptide or 1 µg/mL α-CD3e (clone 145-2C11, BD Biosciences) in the  
486 presence of 1:1000 Golgi-plug for 5 hours. Where indicated, Tg cells were rested for 2 d in

487 recombinant human IL-2 (10 IU/mL) prior to re-stimulation with plate-bound  $\alpha$ -CD3 for 6 h in  
488 the presence or absence of 1:1000 Golgi-plug. IFN- $\gamma$  and IL-4 protein in culture supernatants were  
489 quantified using the Cytokine Bead Array according to the manufacturer's instructions (BD  
490 Biosciences)

491

## 492 **Flow Cytometry**

493 All samples were acquired on the BD Fortessa using FACSDiva software (BD Biosciences) and  
494 analysis was performed using FowJo 10 (BD, Franklin Lakes, NJ, USA). Up to  $5 \times 10^6$  cells were  
495 washed in cold FACS wash (PBS supplemented with 2% FCS and 2mM EDTA) prior to being  
496 stained with a surface receptor antibody cocktail containing FcBlock (BD, 2.4G2) and  
497 LIVE/DEAD fixable blue dead cell stain (Thermo Fisher Scientific) for 30 minutes at 4°C. For  
498 analysis of IL-12R $\beta$ 2 expression, cells were stained separately in FACS wash containing IL-  
499 12R $\beta$ 2-Biotin (REA200, Miltenyi Biotec) and FcBlock for 30 minutes at 4°C. Where appropriate,  
500 cells were stained in FACS wash containing streptavidin PE-Cy7/7 conjugates for 20 minutes at  
501 4°C before being incubated with the surface antibody cocktail. The following monoclonal  
502 antibodies were used for the detection of cell surface markers: CD4 (RM4-5), CD44 (IM7), CD25  
503 (PC61) (all from BD Biosciences); and CXCR3 (CXCR3-173, BioLegend, San Diego, CA, USA).  
504 Cells were washed in FACS buffer prior to acquisition.

505 For detection of intracellular transcription factors and cytokines, surface stained cells were  
506 fixed with 100  $\mu$ L Cytofix/Cytoperm (BD Biosciences) for 15 minutes at 4°C to preserve GFP  
507 expression. To improve transcription factor staining, in some experiments, cells were then  
508 incubated with 100  $\mu$ L 1x Fixation/Permeabilization solution (Thermo Fisher Scientific) for 30

509 minutes at 4°C. Cells were thoroughly washed in 1x Permeabilization buffer (Thermo Fisher  
510 Scientific). Cells were incubated for 1 hour at 4°C in 1x Permeabilization buffer containing a  
511 cocktail of the following monoclonal antibodies: IFN- $\gamma$  (XMG1.2), IL-4 (11B11) (both from BD  
512 Biosciences); T-bet (4B10, Biolegend), Ki-67 (SolA15) and IRF4 (3E4) (both from Thermo Fisher  
513 Scientific). Cells were washed in 1x Permeabilization buffer and resuspended in FACS buffer prior  
514 to acquisition.

515 For detection of phosphorylated proteins and myc, at the indicated time points, cells were  
516 immediately fixed and permeabilized using the Transcription Factor Phospho Buffer set (BD  
517 Biosciences) as per the manufacturers instructions. For analysis of myc expression, cells were  
518 incubated in 1xPermbuffer III (BD) containing purified anti-myc (clone D84C12, Cell Signaling,  
519 Danver, MA, USA) or rabbit IgG isotype matched control for 1 hour at 4°C. Cells were washed  
520 and then incubated with polyclonal anti-rabbit IgG (H+L) (Thermo Fisher Scientific) for 1 hour at  
521 4°C. For the detection of phosphorylated proteins, cells were incubated with 1xPermbuffer III  
522 containing monoclonal antibodies against phosphorylated-S6-Ribosomal protein (D57.2.2E, Cell  
523 Signaling) or phosphorylated-mTOR (clone MRRBY, Thermo Fisher Scientific) for 30 minutes at  
524 4°C. Cells were thoroughly washed in 1x Permbuffer III, FACS wash and then incubated in FACS  
525 wash containing monoclonal antibodies targeting cell surface markers and FcBlock for 30 minutes  
526 at 4°C. Cells were thoroughly washed in FACS wash prior to acquisition.

527

### 528 **Organ collection and processing for imaging**

529 Spleens and the caudate lobe of livers were collected for microscopic imaging. The spleens were  
530 cut into quarters. Tissues were then placed in 5 mL of 4% PFA for 12 hours at 4°C. Fixed tissues  
531 were then transferred into 30% (v/v) sucrose (Sigma-Aldrich) in PBS. After 24 hours tissues were

532 embedded in Optimal Cutting Temperature (OCT) compound (VWR Chemicals, Atlanta, GA,  
533 USA) and snap frozen on a metal bar cooled by dry ice. Frozen tissue blocks were then sectioned  
534 at 10  $\mu\text{m}$  on a Shandon Cryotome E (Thermo Fisher Scientific). Sections were stored at  $-80^{\circ}\text{C}$  until  
535 use.

536 Frozen slides were allowed to thaw at room temperature for 10 min before proceeding with  
537 staining. Sections were blocked in PBS containing 3% (v/v) normal goat serum (0.1% (v/v) Triton  
538 X-100 in PBS for 30 mins at RT. Sections were incubated overnight at  $4^{\circ}\text{C}$  with anti-CD3 (17A2),  
539 -B220 (RA3-6B2) (both from BD Biosciences), and/or -F4/80 (Thermo Fisher Scientific)  
540 antibodies diluted in 3% (v/v) normal goat serum (Cell Signaling) in PBS. Sections were washed  
541 3 times in PBS, and the incubated with streptavidin AF555 (Thermo Fisher Scientific) for 1 hour  
542 at RT. Sections were washed 3 times in PBS and then mounted using Prolong Gold (Thermo Fisher  
543 Scientific). Sections were imaged on a Deltavision Personal (GE Healthcare Life Sciences, Taipei,  
544 Taiwan) and image analysis was performed using FIJI software v1.51w (NIH Research Services,  
545 Bethesda, MD, USA).

546

#### 547 **Determination of the intrasplenic localisation of transferred T cells and enumeration of** 548 **hepatic granulomas**

549 The number of adoptively transferred TCR Tg CD4<sup>+</sup> T cells, defined based on their dual expression  
550 of GFP and CD3, were counted using the cell counter plugin on FIJI software v1.51w. Two non-  
551 consecutive sections with similar size from each spleen were analyzed. The number of double  
552 positive T cells was quantified in 3 different distinct regions of the spleen: T cell zone (CD3<sup>+</sup>), B  
553 cell follicles (CD3<sup>-</sup>F4/80<sup>-</sup>) and the red pulp (F4/80<sup>+</sup>). The number of hepatic granulomas  
554 (CD3<sup>+</sup>DAPI<sup>+</sup>F480<sup>+</sup> aggregates with a size greater than 50  $\mu\text{M}$ ) were counted in ten non-

555 consecutive sections. Section selected for counting were more than 50  $\mu\text{M}$  apart to avoid double  
556 counting of the same hepatic granulomas.

557

## 558 **Proliferation Modeling**

559 Quantification of cell numbers for *in vitro* was performed by adding a known number of Rainbow  
560 Beads (BD) prior to sample acquisition. FlowJo 10 was used to model cell division numbers  
561 respective to an unstimulated control. The same gating of cell division numbers were used for  
562 responding samples within the time-point. This was used to determine the proportion of cells in  
563 each division and at each time-point.  $1 \times 10^4$  Rainbow Beads were included prior to flow  
564 cytometric acquisition to enumerate the number of cells in each division. Since only a proportion  
565 of a starting population of cells will have participated in cell division by the end of an experiment,  
566 the precursor cohort method allows us to trace cells that have actually divided (precursor cohort)  
567 to quantify the time required to reach first division and the rate of subsequent cell cycles. The  
568 methods are described by (8) and described here in brief. Precursor cohort numbers ( $C_i$ ) are  
569 quantified in accordance to the equation below.

$$570 \quad C_i = \frac{\text{total number of cells in division } i}{2^{\text{division } i}}$$

571 The number of precursor cells in each division at each time point can be plotted. The average  
572 division number of cells is estimated by using the equation below. Here,  $K$  is the maximum number  
573 of divisions that can be resolved.

$$574 \quad \text{mean division number} = \frac{\sum_{k=0}^K k \cdot C_k}{\sum_{k=0}^K C_k}$$

575 The mean division number is plotted against time. When a trend line is fitted to the data using  
576 linear regression analysis, the equation of the line ( $y = mx$ ) can be used to calculate the time to

577 first division and the rate of subsequent divisions. Here,  $y$  is the division number,  $m$  the gradient,  
578 and  $x$  is time. Using this equation, we can work out the time ( $x$ ) to first division by substituting  $y$   
579 for division number 1. Subsequent division times are calculated by taking the inverse of the  
580 gradient:

$$581 \quad \textit{Division time} = \frac{1}{m}$$

582

### 583 **Estimating the mean distribution of times to first division and T-bet expression**

584 The proportion of undivided or T-bet-negative cells across different time points is fitted with an  
585 inverted cumulative lognormal distribution. The best-fit values of the mean ( $\mu$ ) and standard  
586 deviation (sd.) for this distribution were used to determine the probability lognormal distribution  
587 of times to first division (8, 23, 24) or T-bet expression. The  $\mu$  of the probability distribution  
588 provides an estimate for the time to first division or T-bet expression.

589

### 590 **Statistical Analysis**

591 All statistical analyses were performed using Prism 7 (GraphPad Software, San Diego, CA, USA).  
592 Statistical differences between two groups were evaluated using the Student's  $t$  test. Differences  
593 between more than two groups were calculated using 2way analysis of variance (ANOVA) with  
594 Tukey's multiple comparisons test. Results with  $p < 0.05$  were deemed statistically significant,  
595 where; \*  $p < 0.05$ , \*\*  $p < 0.01$ , \*\*\*  $p < 0.001$ .

596



597 **Acknowledgments:**

598 We thank E. Pamer and M. Glickman (Memorial Sloan-Kettering Cancer Center) for providing  
599 the transgenic T cell mouse lines. We also thank P. Hodgkin and S. Heinzl (Walter and Eliza Hall  
600 Institute) and D. Jankovic (NIH) for reading this manuscript. We acknowledge M. Coleman, S.  
601 Warner and H. Rathbone for their thoughtful discussion, and M. Soud for proofreading this  
602 manuscript. Finally, we are grateful to the Centenary Institute Animal and Flow Cytometry Core  
603 facilities for their support.

604

605 **Funding:**

606 This work was supported by a National Health and Medical Research Council (NHMRC) of  
607 Australia Project (APP1146677). N.D.B., L.D., and T.A.C were supported by Australian  
608 Postgraduate Awards.

609

610 **Competing interests:**

611 The authors declare no competing interests.

612

613 **References:**

- 614 1. A. V. Gett, P. D. Hodgkin, Cell division regulates the T cell cytokine repertoire, revealing  
615 a mechanism underlying immune class regulation. *Proc Natl Acad Sci U S A* **95**, 9488-  
616 9493 (1998).
- 617 2. J. J. Bird *et al.*, Helper T cell differentiation is controlled by the cell cycle. *Immunity* **9**,  
618 229-237 (1998).
- 619 3. A. Richter, M. Lohning, A. Radbruch, Instruction for cytokine expression in T helper  
620 lymphocytes in relation to proliferation and cell cycle progression. *J Exp Med* **190**, 1439-  
621 1450 (1999).
- 622 4. H. H. Chu *et al.*, Positive selection optimizes the number and function of MHCII-restricted  
623 CD4<sup>+</sup> T cell clones in the naive polyclonal repertoire. *Proc Natl Acad Sci U S A* **106**,  
624 11241-11245 (2009).
- 625 5. J. J. Moon *et al.*, Naive CD4(+) T cell frequency varies for different epitopes and predicts  
626 repertoire diversity and response magnitude. *Immunity* **27**, 203-213 (2007).
- 627 6. N. J. Tubo, M. K. Jenkins, TCR signal quantity and quality in CD4(+) T cell differentiation.  
628 *Trends Immunol* **35**, 591-596 (2014).
- 629 7. M. Ruterbusch, K. B. Pruner, L. Shehata, M. Pepper, In Vivo CD4(+) T Cell Differentiation  
630 and Function: Revisiting the Th1/Th2 Paradigm. *Annu Rev Immunol* **38**, 705-725 (2020).
- 631 8. J. M. Marchingo *et al.*, T cell signaling. Antigen affinity, costimulation, and cytokine  
632 inputs sum linearly to amplify T cell expansion. *Science* **346**, 1123-1127 (2014).
- 633 9. D. Zehn, S. Y. Lee, M. J. Bevan, Complete but curtailed T-cell response to very low-  
634 affinity antigen. *Nature* **458**, 211-214 (2009).

- 635 10. A. J. Ozga *et al.*, pMHC affinity controls duration of CD8<sup>+</sup> T cell-DC interactions and  
636 imprints timing of effector differentiation versus expansion. *J Exp Med* **213**, 2811-2829  
637 (2016).
- 638 11. N. Fazilleau, L. J. McHeyzer-Williams, H. Rosen, M. G. McHeyzer-Williams, The  
639 function of follicular helper T cells is regulated by the strength of T cell antigen receptor  
640 binding. *Nat Immunol* **10**, 375-384 (2009).
- 641 12. S. Keck *et al.*, Antigen affinity and antigen dose exert distinct influences on CD4 T-cell  
642 differentiation. *Proc Natl Acad Sci U S A* **111**, 14852-14857 (2014).
- 643 13. D. I. Kotov *et al.*, TCR Affinity Biases Th Cell Differentiation by Regulating CD25,  
644 Eef1e1, and Gbp2. *J Immunol* (2019).
- 645 14. J. Zhu, T Helper Cell Differentiation, Heterogeneity, and Plasticity. *Cold Spring Harb*  
646 *Perspect Biol* **10** (2018).
- 647 15. J. Magram *et al.*, IL-12-deficient mice are defective in IFN gamma production and type 1  
648 cytokine responses. *Immunity* **4**, 471-481 (1996).
- 649 16. C.-S. Hsieh *et al.*, Development of TH1 CD4<sup>+</sup> T cells through IL-12 produced by Listeria-  
650 induced macrophages. *Science* **260**, 547-549 (1993).
- 651 17. G. Trinchieri, Interleukin-12 and the regulation of innate resistance and adaptive immunity.  
652 *Nat Rev Immunol* **3**, 133-146 (2003).
- 653 18. N. van Panhuys, F. Klauschen, R. N. Germain, T-cell-receptor-dependent signal intensity  
654 dominantly controls CD4(+) T cell polarization In Vivo. *Immunity* **41**, 63-74 (2014).
- 655 19. J. P. Snook, C. Kim, M. A. Williams, TCR signal strength controls the differentiation of  
656 CD4(+) effector and memory T cells. *Sci Immunol* **3** (2018).

- 657 20. D. DiToro *et al.*, Differential IL-2 expression defines developmental fates of follicular  
658 versus nonfollicular helper T cells. *Science* **361** (2018).
- 659 21. N. J. Tubo *et al.*, Single naive CD4<sup>+</sup> T cells from a diverse repertoire produce different  
660 effector cell types during infection. *Cell* **153**, 785-796 (2013).
- 661 22. A. M. Gallegos *et al.*, Control of T cell antigen reactivity via programmed TCR  
662 downregulation. *Nat Immunol* **17**, 379-386 (2016).
- 663 23. V. R. Buchholz *et al.*, Disparate individual fates compose robust CD8<sup>+</sup> T cell immunity.  
664 *Science* **340**, 630-635 (2013).
- 665 24. C. Gerlach *et al.*, Heterogeneous differentiation patterns of individual CD8<sup>+</sup> T cells.  
666 *Science* **340**, 635-639 (2013).
- 667 25. M. Afkarian *et al.*, T-bet is a STAT1-induced regulator of IL-12R expression in naive  
668 CD4<sup>+</sup> T cells. *Nat Immunol* **3**, 549-557 (2002).
- 669 26. A. A. Lighvani *et al.*, T-bet is rapidly induced by interferon- $\gamma$  in lymphoid and myeloid  
670 cells. *Proceedings of the National Academy of Sciences* **98**, 15137-15142 (2001).
- 671 27. B. Nandi, S. M. Behar, Regulation of neutrophils by interferon-gamma limits lung  
672 inflammation during tuberculosis infection. *J Exp Med* **208**, 2251-2262 (2011).
- 673 28. S. Heinzl *et al.*, A Myc-dependent division timer complements a cell-death timer to  
674 regulate T cell and B cell responses. *Nat Immunol* **18**, 96-103 (2017).
- 675 29. A. M. Cooper, J. Magram, J. Ferrante, I. M. Orme, Interleukin 12 (IL-12) is crucial to the  
676 development of protective immunity in mice intravenously infected with Mycobacterium  
677 tuberculosis. *The Journal of experimental medicine* **186**, 39-45 (1997).
- 678 30. J. L. Casanova, L. Abel, Genetic dissection of immunity to mycobacteria: the human  
679 model. *Annu Rev Immunol* **20**, 581-620 (2002).

- 680 31. W. Liao, J. X. Lin, L. Wang, P. Li, W. J. Leonard, Modulation of cytokine receptors by IL-  
681 2 broadly regulates differentiation into helper T cell lineages. *Nat Immunol* **12**, 551-559  
682 (2011).
- 683 32. A. C. Richard *et al.*, T cell cytolytic capacity is independent of initial stimulation strength.  
684 *Nat Immunol* **19**, 849-858 (2018).
- 685 33. M. Prlic, G. Hernandez-Hoyos, M. J. Bevan, Duration of the initial TCR stimulus controls  
686 the magnitude but not functionality of the CD8+ T cell response. *J Exp Med* **203**, 2135-  
687 2143 (2006).
- 688 34. K. A. Allison *et al.*, Affinity and dose of TCR engagement yield proportional enhancer and  
689 gene activity in CD4+ T cells. *Elife* **5** (2016).
- 690 35. V. Krishnamoorthy *et al.*, The IRF4 Gene Regulatory Module Functions as a Read-Write  
691 Integrator to Dynamically Coordinate T Helper Cell Fate. *Immunity* **47**, 481-497 e487  
692 (2017).
- 693 36. S. J. Szabo, A. S. Dighe, U. Gubler, K. M. Murphy, Regulation of the interleukin (IL)-12R  
694 beta 2 subunit expression in developing T helper 1 (Th1) and Th2 cells. *J Exp Med* **185**,  
695 817-824 (1997).
- 696 37. P. B. Schiff, S. B. Horwitz, Taxol stabilizes microtubules in mouse fibroblast cells. *Proc*  
697 *Natl Acad Sci U S A* **77**, 1561-1565 (1980).
- 698 38. E. A. Bach *et al.*, Ligand-induced autoregulation of IFN-gamma receptor beta chain  
699 expression in T helper cell subsets. *Science* **270**, 1215-1218 (1995).
- 700 39. A. Pernis *et al.*, Lack of interferon gamma receptor beta chain and the prevention of  
701 interferon gamma signaling in TH1 cells. *Science* **269**, 245-247 (1995).
- 702 40. J. R. Groom, A. D. Luster, CXCR3 in T cell function. *Exp Cell Res* **317**, 620-631 (2011).

- 703 41. G. M. Lord *et al.*, T-bet is required for optimal proinflammatory CD4<sup>+</sup> T-cell trafficking.  
704 *Blood* **106**, 3432-3439 (2005).
- 705 42. V. R. Taqueti *et al.*, T-bet controls pathogenicity of CTLs in the heart by separable effects  
706 on migration and effector activity. *J Immunol* **177**, 5890-5901 (2006).
- 707 43. A. O'Garra *et al.*, The immune response in tuberculosis. *Annu Rev Immunol* **31**, 475-527  
708 (2013).
- 709 44. J. G. Egen *et al.*, Intravital imaging reveals limited antigen presentation and T cell effector  
710 function in mycobacterial granulomas. *Immunity* **34**, 807-819 (2011).
- 711 45. C. Y. Ma, J. C. Marioni, G. M. Griffiths, A. C. Richard, Stimulation strength controls the  
712 rate of initiation but not the molecular organisation of TCR-induced signalling. *Elife* **9**  
713 (2020).
- 714 46. N. Kimblin *et al.*, Quantification of the infectious dose of *Leishmania major* transmitted to  
715 the skin by single sand flies. *Proc Natl Acad Sci U S A* **105**, 10125-10130 (2008).
- 716 47. D. Saini *et al.*, Ultra-low dose of *Mycobacterium tuberculosis* aerosol creates partial  
717 infection in mice. *Tuberculosis (Edinb)* **92**, 160-165 (2012).
- 718 48. S. Constant, C. Pfeiffer, A. Woodard, T. Pasqualini, K. Bottomly, Extent of T cell receptor  
719 ligation can determine the functional differentiation of naive CD4<sup>+</sup> T cells. *J Exp Med* **182**,  
720 1591-1596 (1995).
- 721 49. C. Pfeiffer *et al.*, Altered peptide ligands can control CD4 T lymphocyte differentiation in  
722 vivo. *J Exp Med* **181**, 1569-1574 (1995).
- 723 50. E. G. Schulz, L. Mariani, A. Radbruch, T. Höfer, Sequential polarization and imprinting of  
724 type 1 T helper lymphocytes by interferon- $\gamma$  and interleukin-12. *Immunity* **30**, 673-683  
725 (2009).

- 726 51. A. C. Mullen *et al.*, Role of T-bet in Commitment of TH1 Cells Before IL-12-Dependent  
727 Selection. *Science* **292**, 1907-1910 (2001).
- 728 52. R. J. Boyton, D. M. Altmann, Is selection for TCR affinity a factor in cytokine polarization?  
729 *Trends Immunol* **23**, 526-529 (2002).
- 730 53. G. Yap, M. Pesin, A. Sher, Cutting edge: IL-12 is required for the maintenance of IFN-  
731 gamma production in T cells mediating chronic resistance to the intracellular pathogen,  
732 *Toxoplasma gondii*. *J Immunol* **165**, 628-631 (2000).
- 733 54. C. G. Feng *et al.*, Maintenance of pulmonary Th1 effector function in chronic tuberculosis  
734 requires persistent IL-12 production. *The Journal of Immunology* **174**, 4185-4192 (2005).
- 735 55. A. Y. Park, B. D. Hondowicz, P. Scott, IL-12 is required to maintain a Th1 response during  
736 *Leishmania major* infection. *J Immunol* **165**, 896-902 (2000).
- 737 56. L. Stobie *et al.*, The role of antigen and IL-12 in sustaining Th1 memory cells in vivo: IL-  
738 12 is required to maintain memory/effector Th1 cells sufficient to mediate protection to an  
739 infectious parasite challenge. *Proc Natl Acad Sci U S A* **97**, 8427-8432 (2000).
- 740 57. Y. Tanaka *et al.*, T helper type 2 differentiation and intracellular trafficking of the  
741 interleukin 4 receptor-alpha subunit controlled by the Rac activator Dock2. *Nat Immunol*  
742 **8**, 1067-1075 (2007).
- 743 58. G. Perona-Wright, K. Mohrs, K. D. Mayer, M. Mohrs, Differential regulation of IL-  
744 4Ralpha expression by antigen versus cytokine stimulation characterizes Th2 progression  
745 in vivo. *J Immunol* **184**, 615-623 (2010).
- 746 59. S. J. Keppler, K. Rosenits, T. Koegl, S. Vucikuja, P. Aichele, Signal 3 cytokines as  
747 modulators of primary immune responses during infections: the interplay of type I IFN and  
748 IL-12 in CD8 T cell responses. *PLoS One* **7**, e40865 (2012).

- 749 60. N. N. Orgun, M. A. Mathis, C. B. Wilson, S. S. Way, Deviation from a strong Th1-  
750 dominated to a modest Th17-dominated CD4 T cell response in the absence of IL-12p40  
751 and type I IFNs sustains protective CD8 T cells. *J Immunol* **180**, 4109-4115 (2008).
- 752 61. S. S. Way, C. Havenar-Daughton, G. A. Kolumam, N. N. Orgun, K. Murali-Krishna, IL-  
753 12 and type-I IFN synergize for IFN-gamma production by CD4 T cells, whereas neither  
754 are required for IFN-gamma production by CD8 T cells after *Listeria monocytogenes*  
755 infection. *J Immunol* **178**, 4498-4505 (2007).
- 756 62. A. Bot, E. Rodrigo, T. Wolfe, S. Bot, M. G. Von Herrath, Infection-triggered regulatory  
757 mechanisms override the role of STAT 4 in control of the immune response to influenza  
758 virus antigens. *J Virol* **77**, 5794-5800 (2003).
- 759 63. A. Oxenius, U. Karrer, R. M. Zinkernagel, H. Hengartner, IL-12 is not required for  
760 induction of type 1 cytokine responses in viral infections. *J Immunol* **162**, 965-973 (1999).
- 761 64. K. Mozdzanowska, K. Maiese, W. Gerhard, Th cell-deficient mice control influenza virus  
762 infection more effectively than Th- and B cell-deficient mice: evidence for a Th-  
763 independent contribution by B cells to virus clearance. *J Immunol* **164**, 2635-2643 (2000).
- 764 65. S. H. Kaufmann, C. H. Ladel, Role of T cell subsets in immunity against intracellular  
765 bacteria: experimental infections of knock-out mice with *Listeria monocytogenes* and  
766 *Mycobacterium bovis* BCG. *Immunobiology* **191**, 509-519 (1994).
- 767 66. M. E. Mielke, G. Niedobitek, H. Stein, H. Hahn, Acquired resistance to *Listeria*  
768 *monocytogenes* is mediated by Lyt-2<sup>+</sup> T cells independently of the influx of monocytes  
769 into granulomatous lesions. *J Exp Med* **170**, 589-594 (1989).



- 770 67. R. Ahmed, L. D. Butler, L. Bhatti, T4<sup>+</sup> T helper cell function in vivo: differential  
771 requirement for induction of antiviral cytotoxic T-cell and antibody responses. *J Virol* **62**,  
772 2102-2106 (1988).
- 773 68. E. S. Hwang, J. H. Hong, L. H. Glimcher, IL-2 production in developing Th1 cells is  
774 regulated by heterodimerization of RelA and T-bet and requires T-bet serine residue 508.  
775 *J Exp Med* **202**, 1289-1300 (2005).
- 776 69. A. V. Villarino *et al.*, Helper T cell IL-2 production is limited by negative feedback and  
777 STAT-dependent cytokine signals. *J Exp Med* **204**, 65-71 (2007).
- 778 70. K. A. Prendergast *et al.*, The Ag85B protein of the BCG vaccine facilitates macrophage  
779 uptake but is dispensable for protection against aerosol *Mycobacterium tuberculosis*  
780 infection. *Vaccine* **34**, 2608-2615 (2016).
